# Supplementary material for: Development of a specific live-cell assay for native autophagic flux
Source: PubMed Central journal article supplement (PMC8368035; doi:10.1016/j.jbc.2021.101003), 2021-07-23

## Supplemental material:

### Figure Captions:

#### **Figure S1: Validation of Dendra2-LC3 HEK293T cells.**

(A) Schematic of the *MAP1LC3B* (*LC3*) locus, with untranslated regions (UTRs) in white, exons in blue, and introns as lines. The *Dendra2* open reading frame (ORF) was inserted just downstream of the *LC3* 5'UTR and start codon in exon 1, and sequenced verified in two separate HEK293T cell lines. (B) HEK293T cells were transfected with 20nM and 40nM ATG5 siRNA, or 40nM non-targeting siRNA. Lysates were collected 2d later and subject to Western blotting with anti-ATG5 and GAPDH antibodies. Relative to scramble siRNA, 20nM and 40nM ATG5 siRNA produced a 58% and 64% knockdown of ATG5 protein, respectively. ATG5 levels were normalized to GAPDH.

#### **Figure S2: Aggregation of Dendra2 tagged proteins causes a supraphysiological increase in signal.**

Primary cortical neurons were co-transfected on DIV4 with plasmids encoding EGFP (blue) and a Dendra2-tagged fragment of mutant huntingtin (HTT) carrying a pathologic expansion of 74 glutamine residues (Dendra2-HTT-exon1-Q74)[115]. 24h after transfection, Dendra2-HTT-exon1-Q74 was photoconverted with a 1s pulse of 405nm light and subsequently imaged via automated microscopy. The decay in TRITC (red) intensity was measured every hour as a metric for protein degradation. The TRITC intensity spikes upon aggregate formation, preventing accurate measurements of protein half-life. Individual lines correspond to specific cells, labeled in white in the image panels. Red cell labels indicate aggregate formation. Scale bar = 50µm

#### **Figure S3: Off-target contributions by proteasomal inhibition and autofluorescence can compromise the specificity of autophagy flux estimates in Dendra2-LC3 cells.**

(A) The extent of Dendra2-LC3 stabilization after treatment with DMSO, 20nM Bafilomycin-A1, 20µM MDL-28170, 100nM Bortezomib, 20nM Bafilomycin-A1 + 20µM MDL-28170, and 20nM Bafilomycin-A1 + 100nM Bortezomib was quantified in photoconverted Dendra2-LC3 HEK cells. Fluorescence is normalized to background-subtracted post-conversion intensity. Error bars signify SEM from three replicate

experiments.  $*=p<.01$ , Tukey's posthoc test relative to DMSO at 11H timepoint. **(B)** Unmodified HEK293T cells imaged in the RFP channel 9h after drug treatment. Scale bar = 50 $\mu$ m.

**Figure S4: Proportional and bidirectional effects of autophagy modulators highlight assay sensitivity.**

**(A)** Dendra2-LC3 HEK293T cells were treated with increasing concentrations of Torin1 and bafilomycin-A1. Representative images in the GFP (top) and RFP (bottom) channels, pseudocolored to accentuate intensity variations. Scale bar = 100 $\mu$ m. **(B)** Dendra2-LC3 clearance increased in a dose-dependent manner with Torin1 **(B)**, while bafilomycin-A1 resulted in dose-dependent prolongation of Dendra2-LC3 half-life **(C)**. These changes are even more apparent in the GFP channel for both Torin1 **(D)** and bafilomycin-A1 **(E)**. Error bars represent SEM from 8 replicate wells. For (B-E),  $*p<0.05$  using DMSO as reference group with Dunnett's multiple comparisons test. Superscript number indicates the first time point when significance ( $p<0.05$ ) was achieved. **(F)** Dose-response curves for Torin1, NVP-BEZ235, rapamycin, and bafilomycin-A1. For autophagy enhancers, the minimal RFP intensity 7h after drug treatment relative to DMSO was set to 1, and the maximal value set to 0. For inhibitors, the maximum effect represents the maximal RFP intensity within 7h after drug treatment. Dose-response was determined similarly for the GFP channel, utilizing values 14h after drug treatment. Concentration is plotted in nM on a log(2) scale, with  $\geq 3$  replicate wells for each channel shown as colored dots. EC50 and IC50 values are reported along the x-axis for both RFP and GFP.

**Figure S5: independent measures of autophagy confirm inhibition of autophagic flux by candidate compounds.**

**(A)** HeLa cells expressing a tandem LC3 reporter (RFP-GFP-LC3) were treated with the indicated compounds and imaged 12h later in the RFP (middle panels) and GFP (bottom panels) channels. Composite images are displayed on the top row. Concentrations for each compound (3nM bafilomycin-A1; 1 $\mu$ M Quinacrine; 50 $\mu$ M 245536; and 100 $\mu$ M of compounds 1-5) correspond to the lowest dose resulting in the maximum degree of colocalization between GFP and RFP puncta as calculated in (C). Scale bar: 50 $\mu$ m **(B)** The percentage of RFP(+)/GFP(+) puncta was determined using CellProfiler[116]. Images from the GFP (1a) and RFP (1b) channels are uploaded into CellProfiler, nuclei

are identified using the GFP channel (2a-green outlines) and a nuclear mask (2b) is generated. Nuclei that do not pass size or intensity thresholds, or are on the edges of an image, are excluded (2a-purple outlines). Cellular boundaries are identified (3a-purple outlines), and the nuclear mask is subtracted from the newly created cellular mask to produce a cytoplasmic mask (3b). The intensity of cytoplasmic GFP (4a) and RFP (5a) puncta are enhanced, allowing the generation of masks corresponding to puncta in both channels (4b, 5b) and the identification of GFP(+)/RFP(+) autophagosomes (6a, b). Scale bar: 50 $\mu$ m. (C) Dose response curves showing the degree of autophagy inhibition with increasing drug concentrations, plotted on a log<sub>2</sub> scale. The y-axis represents the proportion of RFP(+) puncta that are GFP(+), with the maximum and minimum set to 1.0 and 0, respectively. Dots represent individual technical replicates. (D) RFP-GFP-LC3 HeLa cells were imaged, treated with the lowest dose that produced the maximum response as calculated in (C), then imaged again 0, 4, 8 and 12h after drug treatment. (E) Normalized data from (D), depicting the time to maximal effect for each compound. Data in (D, E) represent mean  $\pm$  SEM from 3 biological replicates, 8 technical replicates each.

**Figure S6: Intrinsic fluorescence confounds flux estimates in a subset of Maybridge library hits**

Unmodified HEK293T cells were treated with each compound that registered as an autophagy inhibitor in the screen of the Maybridge 24K library (Fig. 4) Images were acquired in the GFP and RFP channels 9h after treatment of each drug at either 10 $\mu$ M or 80 $\mu$ M. Images are pseudocolored to accentuate intensity differences. For compounds 1 and 5, the contrast settings for the 80 $\mu$ M images were optimized to emphasize low levels of intrinsic fluorescence. All other images are presented at equivalent brightness and contrast. Scale Bar=50 $\mu$ m (B) Dose response relationships for each drug in the Dendra-LC3 HEK293T (black), HeLa RFP-GFP-LC3 (blue) autophagic flux assays, as well as intrinsic fluorescence in the GFP (green) and RFP (red) channels in unmodified HEK293T cells. In Dendra2-LC3 HEK293T cells the maximum effect represents the greatest increase in RFP intensity 14h after drug treatment. In RFP-GFP-LC3 HeLa cells the effect represents the proportion RFP(+) puncta that are GFP(+), with the maximum and minimum set to 1.0 and 0, respectively. For unlabeled HEK293T cells the maximum fluorescence intensity observed 9h after drug treatment was set to 1 and the lowest to 0. Concentration is plotted in nM on a log(2) scale, with  $\geq$ 3 replicate wells for each

concentration shown as colored dots. Dotted vertical lines correspond to 10 $\mu$ M, which is the concentration the compounds were initially screened at.

**Figure S7: Autophagy modulating drugs elicit varied effects on GFP-LC3 puncta formation and primary cortical and spinal neurons display subtly different rates of autophagic flux.**

(A) Further stratification of Fig. 6C, where LC3-GFP puncta were quantified in day 14 iMNs following 5 hours of treatment with the corresponding compounds. Those cells with more than 10 puncta are labeled in black and those with fewer than 10 puncta in red. (B) Histogram depicting single cell Dendra2-LC3 half-lives in cortical and spinal neurons. Relative to spinal neurons (n=1043), a leftward shift was observed in the Dendra2-LC3 half-life distribution of cortical neurons (n=4058) indicating a greater frequency of cortical neurons exhibiting high rates of autophagic flux compared to spinal neurons ( $p=8.2 \times 10^{-4}$ , two-sample Kolmogorov-Smirnov (KS) test). (C) Consistent with this, the mean single-cell Dendra2-LC3 half-life was slightly reduced in cortical neurons (33.2h) compared to spinal neurons (37.1h) ( $p=7.1 \times 10^{-4}$ , Welch two sample t-test), indicating higher rates of basal autophagy in cortical neurons. (D) NVP-BEZ235 (25nM) treatment produced a trend towards an improvement in the survival of primary cortical neurons expressing iRFP alone, and a trend towards increased toxicity in neurons expressing iRFP-P497H-UBQLN2. Neither comparison reached statistical significance. Table S4 summarizes hazard ratio and statistical significance of each comparison.

**Supporting Movie Captions**

**Supplemental Movie 1: Dendra2-LC3 HEK293T cells treated with DMSO.**

Dendra2-LC3 HEK293T cells imaged 6h after treatment with DMSO, 3x actual speed. Scale bar = 10 $\mu$ m

**Supplemental Movie 2: Dendra2-LC3 HEK293T cells treated with Torin1.**

Dendra2-LC3 HEK293T cells imaged 6h after treatment with 1 $\mu$ M Torin1, 3x actual speed. Scale bar = 10 $\mu$ m

**Supplemental Movie 3: Dendra2-LC3 HEK293T cells treated with Bafilomycin-A1.**

Dendra2-LC3 HEK293T cells imaged 6h after treatment with 20nM Bafilomycin-A1, 3x actual speed. Scale bar = 10 $\mu$ m

**Supplemental Movie 4: Axonal transport of GFP-LC3 in iMNs.** Day 14 GFP-LC3 iMNs imaged 5h after treatment with 5 $\mu$ M AZD5364, actual speed. Scale bar = 10 $\mu$ m

**Supplemental Movie 5: Axonal transport of GFP-LC3 in iMNs.** Day 14 GFP-LC3 iMNs imaged 5 h after treatment with 5 $\mu$ M NVP-BEZ235, 3x actual speed. Scale bar = 10 $\mu$ m

**Table S1:** Summary of Two-Way ANOVA analyses accompanying Figure 2

| Figure | component   | Significant         | P-value |
|--------|-------------|---------------------|---------|
| 2B     | Interaction | F (90,248) = 15.09  | P<.0001 |
| 2B     | Time        | F (30,248) = 96.03  | P<.0001 |
| 2B     | Treatment   | F (3,248) = 1753    | P<.0001 |
| 2C     | Interaction | F (140,348) = 24.92 | P<.0001 |
| 2C     | Time        | F (28,348) = 2422   | P<.0001 |
| 2C     | Treatment   | F (5,348) = 3828    | P<.0001 |
| 2D     | Interaction | F (90,248) = 67.45  | P<.0001 |
| 2D     | Time        | F (30,248) = 74.01  | P<.0001 |
| 2D     | Treatment   | F (3,248) = 5951    | P<.0001 |
| 2E     | Interaction | F (140,348) = 273   | P<.0001 |
| 2E     | Time        | F (28,348) = 222.7  | P<.0001 |
| 2E     | Treatment   | F (5,348) = 21726   | P<.0001 |

**Table S2:** Cox proportional hazards analysis comparing TDP43 expressing primary neurons treated with NVP-BE2235 or vehicle

| group                          | N    | hazard ratio | lower 95% | upper 95% | p-value   |
|--------------------------------|------|--------------|-----------|-----------|-----------|
| GFP/Scramble/DMSO              | 1376 | 1            | 1         | 1         | 1         |
| GFP/Scramble/25nM NVP          | 1501 | 0.8658       | 0.7779    | 0.9637    | 0.0083513 |
| GFP/ATG5 KD/DMSO               | 100  | 1.0974       | 0.832     | 1.4475    | 0.5106564 |
| GFP/ATG5 KD/25nM NVP           | 127  | 1.6811       | 1.3265    | 2.1303    | 1.72E-05  |
| WT-TDP43-GFP/Scramble/DMSO     | 766  | 2.4925       | 2.2382    | 2.7758    | 4.12E-62  |
| WT-TDP43-GFP/Scramble/25nM NVP | 1169 | 2.0319       | 1.8391    | 2.2449    | 3.74E-44  |
| WT-TDP43-GFP/ATG5 KD/DMSO      | 287  | 2.2457       | 1.9353    | 2.6058    | 1.55E-26  |
| WT-TDP43-GFP/ATG5 KD/25nM NVP  | 699  | 2.2639       | 2.0209    | 2.5362    | 3.75E-45  |

| group                          | N    | hazard ratio | lower 95% | upper 95% | p-value   |
|--------------------------------|------|--------------|-----------|-----------|-----------|
| WT-TDP43-GFP/Scramble/DMSO     | 766  | 1            | 1         | 1         | 1         |
| WT-TDP43-GFP/Scramble/25nM NVP | 1169 | 0.8116       | 0.7333    | 0.8983    | 5.54E-05  |
| WT-TDP43-GFP/ATG5 KD/DMSO      | 287  | 0.8963       | 0.7716    | 1.041     | 0.1516617 |
| WT-TDP43-GFP/ATG5 KD/25nM NVP  | 699  | 0.9062       | 0.8076    | 1.0167    | 0.0934768 |

| group                         | N   | hazard ratio | lower 95% | upper 95% | p-value   |
|-------------------------------|-----|--------------|-----------|-----------|-----------|
| GFP/ATG5 KD/DMSO              | 100 | 1            | 1         | 1         | 1         |
| GFP/ATG5 KD/25nM NVP          | 127 | 1.5133       | 1.0676    | 2.1452    | 0.0199555 |
| WT-TDP43-GFP/ATG5 KD/DMSO     | 287 | 1.9916       | 1.4804    | 2.6795    | 5.32E-06  |
| WT-TDP43-GFP/ATG5 KD/25nM NVP | 699 | 2.0121       | 1.5199    | 2.6636    | 1.03E-06  |

| group                          | N    | hazard ratio | lower 95% | upper 95% | p-value  |
|--------------------------------|------|--------------|-----------|-----------|----------|
| WT-TDP43-GFP/Scramble/DMSO     | 766  | 1            | 1         | 1         | 1        |
| WT-TDP43-GFP/Scramble/25nM NVP | 1169 | 0.8068       | 0.7289    | 0.893     | 3.39E-05 |

| group                         | N   | hazard ratio | lower 95% | upper 95% | p-value   |
|-------------------------------|-----|--------------|-----------|-----------|-----------|
| WT-TDP43-GFP/ATG5 KD/DMSO     | 287 | 1            | 1         | 1         | 1         |
| WT-TDP43-GFP/ATG5 KD/25nM NVP | 699 | 1.0115       | 0.8668    | 1.1803    | 0.8849334 |

**Table S3:** Cox proportional hazards analysis for iRFP-UBQLN2 expressing primary neurons treated with CCT128930 or vehicle

| <b>group</b>         | <b>N</b> | <b>hazard ratio</b> | <b>lower 95%</b> | <b>upper 95%</b> | <b>p-value</b> |
|----------------------|----------|---------------------|------------------|------------------|----------------|
| iRFP DMSO            | 1138     | 1                   | 1                | 1                | 1              |
| iRFP 1uM CCT         | 1323     | 1.0393              | 0.9383           | 1.1511           | 0.4597729      |
| UBQLN2-P497H DMSO    | 1106     | 1.2333              | 1.1156           | 1.3634           | 4.18E-05       |
| UBQLN2-P497H 1uM CCT | 1012     | 1.3877              | 1.2516           | 1.5385           | 4.88E-10       |

| <b>group</b>         | <b>N</b> | <b>hazard ratio</b> | <b>lower 95%</b> | <b>upper 95%</b> | <b>p-value</b> |
|----------------------|----------|---------------------|------------------|------------------|----------------|
| UBQLN2-P497H DMSO    | 1106     | 1                   | 1                | 1                | 1              |
| UBQLN2-P497H 1uM CCT | 1012     | 1.1839              | 1.0666           | 1.3142           | 0.0015221      |



**Table S4:** Cox proportional hazards analysis in iRFP-UBQLN2 expressing primary neurons treated with NVP-BEZ235 or vehicle

| <b>group</b>          | <b>N</b> | <b>hazard ratio</b> | <b>lower 95%</b> | <b>upper 95%</b> | <b>p-value</b> |
|-----------------------|----------|---------------------|------------------|------------------|----------------|
| iRFP DMSO             | 1138     | 1                   | 1                | 1                | 1              |
| iRFP 25nM NVP         | 713      | 0.9111              | 0.8106           | 1.0242           | 0.1189461      |
| UBQLN2-P497H DMSO     | 1106     | 1.2238              | 1.1071           | 1.3528           | 7.83E-05       |
| UBQLN2-P497H 25nM NVP | 585      | 1.3077              | 1.1623           | 1.4713           | 8.18E-06       |

UBQLN2-P497H DMSO as reference

| <b>group</b>          | <b>N</b> | <b>hazard ratio</b> | <b>lower 95%</b> | <b>upper 95%</b> | <b>p-value</b> |
|-----------------------|----------|---------------------|------------------|------------------|----------------|
| UBQLN2-P497H DMSO     | 1106     | 1                   | 1                | 1                | 1              |
| UBQLN2-P497H 25nM NVP | 585      | 1.0686              | 0.9498           | 1.2022           | 0.270139       |

**Table S5:** Cox proportional hazards analysis in WT and mutant C9ORF72 iNeurons treated with NVP-BEZ235 or vehicle.

| <b>group</b>     | <b>N</b> | <b>hazard ratio</b> | <b>lower 95%</b> | <b>upper 95%</b> | <b>p-value</b> |
|------------------|----------|---------------------|------------------|------------------|----------------|
| WT DMSO          | 483      | 1                   | 1                | 1                | 1              |
| WT 25nM NVP      | 323      | 1.1751              | 0.9546           | 1.4464           | 0.1280727      |
| C9ORF72 DMSO     | 486      | 0.8888              | 0.7266           | 1.0872           | 0.2516026      |
| C9ORF72 25nM NVP | 343      | 1.1877              | 0.9654           | 1.4613           | 0.1038034      |

| <b>group</b>     | <b>N</b> | <b>hazard ratio</b> | <b>lower 95%</b> | <b>upper 95%</b> | <b>p-value</b> |
|------------------|----------|---------------------|------------------|------------------|----------------|
| C9ORF72 DMSO     | 486      | 1                   | 1                | 1                | 1              |
| C9ORF72 25nM NVP | 343      | 1.3184              | 1.0676           | 1.6281           | 0.0102287      |

**Table S6:** Sense and antisense oligonucleotides cloned into pX335 plasmid

| oligo                    | sequence                          |
|--------------------------|-----------------------------------|
| LC3bD2_Forward_Sense     | CAC CGT TCG GTG AGT GTC GCC GCG A |
| LC3bD2_Forward_Antisense | AAA CTC GCG GCG ACA CTC ACC GAA C |
| LC3bD2_Reverse_Sense     | CAC CGT TCT CCG ACG GCA TGG TGC A |
| LC3bD2_Reverse_Antisense | AAA CTG CAC CAT GCC GTC GGA GAA C |

**Table S7:** Antibodies used in this study

| <b>Antibody</b>                | <b>dilution</b> | <b>manufacturer</b> | <b>Cat #</b> |
|--------------------------------|-----------------|---------------------|--------------|
| Rabbit anti-LC3                | 1:1000          | Cell Signaling      | 2775S        |
| Rabbit anti-ATG5               | 1:1000          | Cell Signaling      | 129945       |
| Mouse anti-GAPDH               | 1:1000          | Millipore           | MAB374       |
| Donkey anti-Mouse iRDye 680RD  | 1:10,000        | LICOR               | 926-68072    |
| Donkey anti-Rabbit iRDye 800CW | 1:10,000        | LICOR               | 926-32213    |

**Table S8:** List of Reagents and equipment used

| Reagent                            | Catalog number | Manufacturer    | Manufacturer location |
|------------------------------------|----------------|-----------------|-----------------------|
| <b>Compounds</b>                   |                |                 |                       |
| Bafilomycin-A1                     | B1793          | Sigma           | St. Louis, MO         |
| Rapamycin                          | 13346          | Cayman Chemical | Ann Arbor, MI         |
| AKT Inhibitor X                    | 14863          | Cayman Chemical | Ann Arbor, MI         |
| Astemizole                         | 16967          | Cayman Chemical | Ann Arbor, MI         |
| LY294002                           | 70920          | Cayman Chemical | Ann Arbor, MI         |
| Quinacrine (hydrochloride hydrate) | 15041          | Cayman Chemical | Ann Arbor, MI         |
| M 344                              | 13174          | Cayman Chemical | Ann Arbor, MI         |
| BAY-1895344                        | 26536          | Cayman          | Ann Arbor, MI         |
| MK2206 hydrochloride               | 11593          | Cayman          | Ann Arbor, MI         |
| CCT128930                          | 18194          | Cayman          | Ann Arbor, MI         |
| NVP-BEZ235                         | S1009          | SelleckChem     | Houston, TX           |

| <b>Media Components</b> |           |                       |                |
|-------------------------|-----------|-----------------------|----------------|
| DMEM                    | 11995-065 | Gibco                 | Waltham, MA    |
| FBS                     | 10438026  | Fisher                | Fair Lawn, NJ  |
| GlutaMAX                | 35050-061 | Gibco                 | Waltham, MA    |
| penicillin-streptomycin |           |                       |                |
| Neumo media             | M07-500   | Cell Guidance Systems | Cambridge, UK  |
| SOS supplement          | M09-50    | Cell Guidance Systems | Cambridge, UK  |
| laminin                 | L2020     | Sigma                 | St. Louis, MO  |
| DMEM/F12                | 11320033  | Gibco                 | Waltham, MA    |
| Y-27632                 | BDB562822 | Fisher                | Fair Lawn, NJ  |
| BDNF                    | 450-02    | Peprotech             | Rocky Hill, NJ |
| NT3                     | 450-03    | Peprotech             | Rocky Hill, NJ |
| N2 Supplement           | 17502-048 | Gibco                 | Waltham, MA    |
| NEAA Supplement         | 11140-050 | Gibco                 | Waltham, MA    |
| Neurobasal-A            | 12349-015 | Gibco                 | Waltham, MA    |
| CultureOne              | A33202-01 | Gibco                 | Waltham, MA    |
| BrainPhys               | 5790      | Stemcell Technologies | Cambridge MA   |
| SM1 supplement          | 5711      | Stemcell Technologies | Cambridge MA   |
| TeSR-E8                 | 5990      | Stemcell Technologies | Cambridge, MA  |
| doxycycline             | D3447     | Sigma                 | St. Louis, MO  |
| Compound E              | 565790    | Millipore             | Waltham, MA    |

| <b>Plasmids</b>               |       |                         |               |
|-------------------------------|-------|-------------------------|---------------|
| pX335 vector                  | 42335 | Addgene                 | Watertown, MA |
| pUCminusMCS                   |       | BlueHeron Biotechnology | Bothell, WA   |
| pUCM-CLYBL-Ngn1-Ngn2-RFP      |       | Michael Ward            | NIH           |
| pUCM-CLYBL-hNgn2,II1,Lhx3-RFP |       | Michael Ward            | NIH           |
| pTLC13-L1                     |       | Michael Ward            | NIH           |
| pLTC13-R1                     |       | Michael Ward            | NIH           |

| <b>siRNA</b>                           |                  |           |               |
|----------------------------------------|------------------|-----------|---------------|
| ON-TARGETplus ATG5 Smartpool siRNA     | L-004374-00-0005 | Dharmacon | LaFayette, CO |
| ON-TARGETplus MAP1LC3B Smartpool siRNA | D-001810-01-05   | Dharmacon | LaFayette, CO |

| <b>Plate/Plate reagents</b>              |         |                 |                     |
|------------------------------------------|---------|-----------------|---------------------|
| TPP 96w plates                           |         | Midsci          | St. Louis, MO       |
| Polyethyleneimine solution               | P3143   | Sigma           | St. Louis, MO       |
| Boric acid                               | A73-500 | Fisher Chemical | Fair Lawn, NJ       |
| sodium tetraborate                       | 221732  | Sigma           | St. Louis, MO       |
| ViewPlate 384w plates                    | 6007460 | Perkin Elmer    | Waltham, MA         |
| Vitronectin                              | A14700  | Gibco           | Waltham, MA         |
| 8-well hydrophobic polymer $\mu$ -slides | 80821   | Ibidi           | Gräfelfing, Germany |

| <b>Miscellaneous</b>                                  |             |            |               |
|-------------------------------------------------------|-------------|------------|---------------|
| Lipofectamine 2000                                    | 11668019    | Invitrogen | Waltham, MA   |
| RIPA buffer                                           | 89900       | Thermo     | Waltham, MA   |
| cOmplete, Mini, EDTA-free Protease Inhibitor cocktail | 11836170001 | Millipore  | Waltham, MA   |
| PhosSTOP phosphatase inhibitor tablets                | 4906845001  | Millipore  | Waltham, MA   |
| DharmaFECT 1                                          | T-2001-02   | Dharmacon  | LaFayette, CO |
| Lipofectamine Stem                                    | STEM00003   | Invitrogen | Waltham, MA   |
| Accutase                                              | A6964       | Sigma      | St. Louis, MO |

| Equipment                                                | Manufacturer       | Manufacturer location |
|----------------------------------------------------------|--------------------|-----------------------|
| Multidrop Combi                                          | Thermo Scientific  | Waltham, MA           |
| Biomek FX <sup>®</sup> laboratory automation workstation | Beckman Coulter    | Brea, CA              |
| ImageXpress Micro                                        | Molecular Devices  | San Jose, CA          |
| FITC-3540B-NTE-ZERO filter                               | Semrock            | Rochester, NY         |
| TxRed-4040C-NTE-ZERO filter                              | Semrock            | Rochester, NY         |
| Brightline DAPI-5060-NTE-ZERO filter                     | Semrock            | Rochester, NY         |
| BioMek FX pintool                                        | Beckman Coulter    | Brea, CA              |
| Lambda XL lamp                                           | Sutter Instruments | Novata, CA            |
| Eclipse Ti inverted microscope                           | Nikon              | Tokyo, Japan          |
| Andor Zyla, 4.2(+) sCMOS camera                          | Oxford Instruments | Abingdon, UK          |
| ONI Nanoimager                                           | Oxford Nanoimaging | Oxford, UK            |

Fig. 3 source data

| Row Labels                        | RFP T9/T0 | DMSO normalized | Torin1 equivalents | Z-score   | status (T9/T0)  | Half-Life | status (half-life) | 9H RFP unlabelled | intrinsic fluorescence |
|-----------------------------------|-----------|-----------------|--------------------|-----------|-----------------|-----------|--------------------|-------------------|------------------------|
| Torin1                            | 0.1845137 | 0.250268516     | 1                  | 16.995801 | enhancer        | 7.6705865 | enhancer           | #N/A              | #N/A                   |
| Rotterin                          | 0.3103447 | 0.42094171      | 0.772354239        | 13.126779 | enhancer        | 9.6050982 | enhancer           | 0.797956473       | NO                     |
| PI-103                            | 0.323565  | 0.438873329     | 0.74843685         | 12.720284 | enhancer        | 8.0504922 | enhancer           | 0.716262471       | NO                     |
| DISULFIRAM                        | 0.4847135 | 0.657450091     | 0.456896791        | 7.7653271 | enhancer        | 10.687805 | enhancer           | 0.752091873       | NO                     |
| GERI-BP002A                       | 0.5231492 | 0.709583059     | 0.387361272        | 6.5835153 | enhancer        | 11.471128 | non-significant    | 0.677914507       | NO                     |
| Penitrem A                        | 0.5260775 | 0.713554907     | 0.382063577        | 6.4934767 | enhancer        | 10.5485   | enhancer           | 0.718935518       | NO                     |
| CYCLOPIROX OLAMINE                | 0.5327825 | 0.722649326     | 0.369933342        | 6.2873136 | enhancer        | 9.7168813 | enhancer           | 0.709758632       | NO                     |
| Forskolin                         | 0.5541604 | 0.751645695     | 0.33125767         | 5.6299896 | enhancer        | 13.252945 | non-significant    | 0.748086874       | NO                     |
| BIX01294 (hydrochloride hydrate)  | 0.5576893 | 0.756432066     | 0.324873557        | 5.5214865 | enhancer        | 10.726347 | enhancer           | 1.171951492       | YES                    |
| NVP-BE235                         | 0.5599758 | 0.759533446     | 0.320736902        | 5.4511807 | enhancer        | 10.538364 | enhancer           | 0.697428956       | NO                     |
| AKT Inhibitor X                   | 0.5710251 | 0.774520418     | 0.300747116        | 5.114383  | enhancer        | 11.093564 | enhancer           | 0.695030009       | NO                     |
| Rapamycin                         | 0.5740593 | 0.778635893     | 0.295257851        | 5.0181438 | enhancer        | 11.295024 | enhancer           | 0.701176479       | NO                     |
| LOPERAMIDE HYDROCHLORIDE          | 0.5814055 | 0.788600034     | 0.281967571        | 4.7922648 | enhancer        | 10.977134 | enhancer           | 0.708235618       | NO                     |
| 3-AMINOBENZAMIDE                  | 0.5816835 | 0.78897711      | 0.281464624        | 4.7837169 | enhancer        | 11.449877 | non-significant    | 0.760392802       | NO                     |
| CAPTOPRIL                         | 0.5860618 | 0.794915658     | 0.273543723        | 4.6490948 | enhancer        | 13.49353  | non-significant    | 0.736081605       | NO                     |
| Salemide                          | 0.596901  | 0.809617597     | 0.253934118        | 4.3158138 | enhancer        | 12.906283 | non-significant    | 0.829920965       | NO                     |
| Etoposide                         | 0.5982324 | 0.811423461     | 0.251525437        | 4.2748764 | enhancer        | 11.392792 | non-significant    | 0.822720117       | NO                     |
| Rho Kinase Inhibitor III, Rockout | 0.6028512 | 0.817688328     | 0.243169289        | 4.1328569 | enhancer        | 12.460079 | non-significant    | 0.719856483       | NO                     |
| Tenovin-6                         | 0.6149372 | 0.834081369     | 0.221304073        | 3.7612401 | enhancer        | 10.974576 | enhancer           | 0.739717126       | NO                     |
| SP 600125                         | 0.6156017 | 0.83498269      | 0.220101881        | 3.7408079 | enhancer        | 13.931769 | non-significant    | 0.648998264       | NO                     |
| Cumene hydroperoxide              | 0.6167726 | 0.836570869     | 0.217983551        | 3.7048051 | enhancer        | 11.240963 | enhancer           | 0.749216947       | NO                     |
| NSC 58817                         | 0.6223491 | 0.844134667     | 0.207894874        | 3.53334   | enhancer        | 11.849385 | non-significant    | 0.741541212       | NO                     |
| Piceatannol                       | 0.6300319 | 0.854555326     | 0.193995686        | 3.2971122 | enhancer        | 12.5709   | non-significant    | 0.777472288       | NO                     |
| Apicidin                          | 0.6323537 | 0.858925335     | 0.188166922        | 3.1980476 | enhancer        | 15.05751  | non-significant    | 0.772912482       | NO                     |
| D609                              | 0.6351433 | 0.861488237     | 0.184748495        | 3.1399487 | enhancer        | 12.741442 | non-significant    | 0.869500013       | NO                     |
| MCCSL-JR-1-012                    | 0.6408857 | 0.869277029     | 0.17435972         | 2.9633832 | non-significant | 14.017406 | non-significant    | #N/A              | #N/A                   |
| PromethazineA?HCl                 | 0.6427614 | 0.871821268     | 0.170966185        | 2.9057073 | non-significant | 13.761132 | non-significant    | #N/A              | #N/A                   |
| RESVERATROL                       | 0.6434143 | 0.872706748     | 0.169785123        | 2.8856342 | non-significant | 12.922154 | non-significant    | #N/A              | #N/A                   |
| TEMPO                             | 0.6441342 | 0.873683309     | 0.168482574        | 2.8634964 | non-significant | 13.614936 | non-significant    | #N/A              | #N/A                   |
| Tunicamycin                       | 0.6456125 | 0.875688382     | 0.165808187        | 2.818043  | non-significant | 12.035867 | non-significant    | #N/A              | #N/A                   |
| Carvedilol                        | 0.6469153 | 0.87745541      | 0.163451305        | 2.7779859 | non-significant | 13.237755 | non-significant    | #N/A              | #N/A                   |
| HC Toxin                          | 0.6487061 | 0.879884452     | 0.160211423        | 2.7229215 | non-significant | 13.863155 | non-significant    | #N/A              | #N/A                   |
| BAICALEIN                         | 0.6513054 | 0.883410037     | 0.155508959        | 2.6429994 | non-significant | 12.401902 | non-significant    | #N/A              | #N/A                   |
| ABC294640?HCl                     | 0.6533247 | 0.886148939     | 0.151855782        | 2.5809107 | non-significant | 12.909977 | non-significant    | #N/A              | #N/A                   |
| CAY10433                          | 0.6538928 | 0.88691949      | 0.150828013        | 2.563443  | non-significant | 12.938385 | non-significant    | #N/A              | #N/A                   |
| UNC0224                           | 0.6559137 | 0.889606065     | 0.147171884        | 2.5013041 | non-significant | 14.557699 | non-significant    | #N/A              | #N/A                   |
| UNC0638                           | 0.656214  | 0.890067899     | 0.14662863         | 2.4920711 | non-significant | 12.827412 | non-significant    | #N/A              | #N/A                   |
| ESCULETIN                         | 0.6581382 | 0.892677894     | 0.14314739         | 2.4329046 | non-significant | 14.904711 | non-significant    | #N/A              | #N/A                   |
| 3230-2939                         | 0.6609233 | 0.89645552      | 0.138108752        | 2.3472689 | non-significant | 13.121287 | non-significant    | #N/A              | #N/A                   |
| 6164173                           | 0.6625523 | 0.89866912      | 0.135156228        | 2.2970884 | non-significant | 12.818855 | non-significant    | #N/A              | #N/A                   |
| lbutroxam                         | 0.6647248 | 0.901611654     | 0.131231445        | 2.2303836 | non-significant | 12.70063  | non-significant    | #N/A              | #N/A                   |
| 17-AAG                            | 0.6651939 | 0.90224801      | 0.130382666        | 2.2159579 | non-significant | 16.444797 | non-significant    | #N/A              | #N/A                   |
| PROBUCOL                          | 0.6652105 | 0.902270495     | 0.130352675        | 2.2154482 | non-significant | 13.569946 | non-significant    | #N/A              | #N/A                   |
| NSC 326231                        | 0.6672498 | 0.905036501     | 0.126663346        | 2.1527451 | non-significant | 12.550828 | non-significant    | #N/A              | #N/A                   |
| 2-PCPA (hydrochloride)            | 0.667518  | 0.905400239     | 0.12617819         | 2.1444995 | non-significant | 13.081273 | non-significant    | #N/A              | #N/A                   |
| Garcinol                          | 0.6677036 | 0.905652009     | 0.125842376        | 2.138792  | non-significant | 12.561633 | non-significant    | #N/A              | #N/A                   |
| ROTENONE                          | 0.6678778 | 0.905888368     | 0.125527117        | 2.1334339 | non-significant | 18.494689 | inhibitor          | #N/A              | #N/A                   |
| PD-98059                          | 0.6690633 | 0.907496353     | 0.123382369        | 2.0969823 | non-significant | 14.28599  | non-significant    | #N/A              | #N/A                   |
| Selenomethionine                  | 0.6690923 | 0.907535581     | 0.123330047        | 2.096093  | non-significant | 12.914913 | non-significant    | #N/A              | #N/A                   |
| Rosmarinic acid                   | 0.6692059 | 0.907689738     | 0.123124431        | 2.0925984 | non-significant | 14.665454 | non-significant    | #N/A              | #N/A                   |
| Sorafenib tosylate                | 0.6696066 | 0.908233228     | 0.122399517        | 2.0802779 | non-significant | 21.413428 | inhibitor          | #N/A              | #N/A                   |
| Imiquimod                         | 0.6709463 | 0.910050353     | 0.119975817        | 2.0390852 | non-significant | 12.904711 | non-significant    | #N/A              | #N/A                   |
| NSC 407286                        | 0.6709971 | 0.910119266     | 0.1198839          | 2.037523  | non-significant | 13.288539 | non-significant    | #N/A              | #N/A                   |
| TAMOXIFEN CITRATE                 | 0.6732574 | 0.913185079     | 0.115794685        | 1.9680235 | non-significant | 12.253597 | non-significant    | #N/A              | #N/A                   |
| C2-dihydroceramide                | 0.6736409 | 0.913705257     | 0.115100866        | 1.9562315 | non-significant | 13.330555 | non-significant    | #N/A              | #N/A                   |
| PAEONOL                           | 0.6739029 | 0.914060563     | 0.114626954        | 1.948177  | non-significant | 12.672234 | non-significant    | #N/A              | #N/A                   |
| 1,2-Dithiole-3-thione             | 0.6746211 | 0.915034783     | 0.113327529        | 1.9260922 | non-significant | 13.275427 | non-significant    | #N/A              | #N/A                   |
| U83836EA?2HCl                     | 0.6747259 | 0.915176821     | 0.113138078        | 1.9228723 | non-significant | 13.896601 | non-significant    | #N/A              | #N/A                   |
| 4112-3315                         | 0.6772235 | 0.918564556     | 0.108619481        | 1.8460751 | non-significant | 13.294124 | non-significant    | #N/A              | #N/A                   |
| FK-866                            | 0.678911  | 0.92085347      | 0.105566501        | 1.7941873 | non-significant | 13.815413 | non-significant    | #N/A              | #N/A                   |
| AMIODARONE HYDROCHLORIDE          | 0.6795477 | 0.921716957     | 0.104414773        | 1.7746127 | non-significant | 13.334482 | non-significant    | #N/A              | #N/A                   |
| TRIFLUOPERAZINE HYDROCHLORIDE     | 0.6824609 | 0.92566842      | 0.099144268        | 1.6850363 | non-significant | 12.380494 | non-significant    | #N/A              | #N/A                   |
| DCHA                              | 0.6829555 | 0.926339302     | 0.098249439        | 1.669828  | non-significant | 14.983584 | non-significant    | #N/A              | #N/A                   |
| 7-Ketocholesterol                 | 0.6836032 | 0.927217812     | 0.097077674        | 1.6499129 | non-significant | 13.527055 | non-significant    | #N/A              | #N/A                   |
| Rolipram                          | 0.6838534 | 0.927557076     | 0.096625159        | 1.642222  | non-significant | 12.541883 | non-significant    | #N/A              | #N/A                   |
| TTFA                              | 0.6843544 | 0.928236686     | 0.095718688        | 1.6268158 | non-significant | 13.861619 | non-significant    | #N/A              | #N/A                   |
| Trehalose                         | 0.6846515 | 0.928639656     | 0.095181202        | 1.6176808 | non-significant | 13.490402 | non-significant    | #N/A              | #N/A                   |
| Thiourea                          | 0.6856344 | 0.929972821     | 0.093403012        | 1.587459  | non-significant | 13.31797  | non-significant    | #N/A              | #N/A                   |
| AICAR                             | 0.6856387 | 0.929978654     | 0.093395232        | 1.5873268 | non-significant | 13.507984 | non-significant    | #N/A              | #N/A                   |
| Sodium Butyrate                   | 0.6868209 | 0.931582134     | 0.091256493        | 1.5509772 | non-significant | 12.965035 | non-significant    | #N/A              | #N/A                   |
| Anacardic Acid                    | 0.6870282 | 0.931863258     | 0.090881526        | 1.5446044 | non-significant | 13.086416 | non-significant    | #N/A              | #N/A                   |
| AS-605240                         | 0.6874543 | 0.93244129      | 0.090110542        | 1.5315009 | non-significant | 12.856711 | non-significant    | #N/A              | #N/A                   |
| Z36                               | 0.6880273 | 0.933218471     | 0.089073929        | 1.5138828 | non-significant | 12.054466 | non-significant    | #N/A              | #N/A                   |
| DTT                               | 0.6890869 | 0.934655626     | 0.087157036        | 1.4813037 | non-significant | 14.250724 | non-significant    | #N/A              | #N/A                   |
| GLUTATHIONE                       | 0.6891187 | 0.93469877      | 0.08709949         | 1.4803256 | non-significant | 13.854817 | non-significant    | #N/A              | #N/A                   |
| Phenidone                         | 0.6897575 | 0.935565309     | 0.08594369         | 1.4606819 | non-significant | 13.428445 | non-significant    | #N/A              | #N/A                   |
| Tanshinone IIA                    | 0.6904378 | 0.936488021     | 0.084712968        | 1.4397648 | non-significant | 17.414632 | inhibitor          | #N/A              | #N/A                   |
| Ambroxol                          | 0.6910091 | 0.937262825     | 0.083679525        | 1.4222006 | non-significant | 13.906999 | non-significant    | #N/A              | #N/A                   |
| SU11652                           | 0.6915105 | 0.937942945     | 0.082772374        | 1.4067828 | non-significant | 48.136378 | inhibitor          | #N/A              | #N/A                   |
| Glucosamine HCl                   | 0.6933736 | 0.940499964     | 0.079401809        | 1.3494974 | non-significant | 13.291728 | non-significant    | #N/A              | #N/A                   |
| CAFFEIC ACID                      | 0.6945561 | 0.942073893     | 0.07726247         | 1.3131376 | non-significant | 13.501902 | non-significant    | #N/A              | #N/A                   |
| 2',5'-Dideoxyadenosine            | 0.6945566 | 0.942074617     | 0.077261505        | 1.3131212 | non-significant | 13.13408  | non-significant    | #N/A              | #N/A                   |
| PM5F                              | 0.6948986 | 0.942535005     | 0.076647435        | 1.3026846 | non-significant | 13.47156  | non-significant    | #N/A              | #N/A                   |
| BHT                               | 0.69497   | 0.94263538      | 0.076513553        | 1.3004092 | non-significant | 13.223421 | non-significant    | #N/A              | #N/A                   |
| Quinine HCl?2H2O                  | 0.6951295 | 0.9428517       | 0.076225024        | 1.2955054 | non-significant | 13.022703 | non-significant    | #N/A              | #N/A                   |
| EX-527                            | 0.695462  | 0.943302609     | 0.075623596        | 1.2852836 | non-significant | 14.076725 | non-significant    | #N/A              | #N/A                   |
| MS-275                            | 0.6965075 | 0.944720718     | 0.073732107        | 1.2531362 | non-significant | 13.713392 | non-significant    | #N/A              | #N/A                   |
| Deoxycholate?Na                   | 0.6977675 | 0.946429811     | 0.0714525          | 1.2143925 | non-significant | 13.377787 | non-significant    | #N/A              | #N/A                   |
| UNC0321 (trifluoroacetate salt)   | 0.6981208 | 0.946908997     | 0.070813357        | 1.2035297 | non-significant | 12.70814  | non-significant    | #N/A              | #N/A                   |
| 1-Naphthoic Acid                  | 0.6983388 | 0.947204633     | 0.070419035        | 1.1968279 | non-significant | 13.556277 | non-significant    | #N/A              | #N/A                   |
| CPD000466364 IDEBENONE            | 0.6984884 | 0.947407546     | 0.070148386        | 1.192228  | non-significant | 15.711231 | non-significant    | #N/A              | #N/A                   |

|                                    |           |             |              |           |                 |           |                 |             |      |
|------------------------------------|-----------|-------------|--------------|-----------|-----------------|-----------|-----------------|-------------|------|
| 6-Gingerol                         | 0.6985388 | 0.947475958 | 0.070057137  | 1.1906772 | non-significant | 13.358118 | non-significant | #/NA        | #/NA |
| Sinefungin                         | 0.6993167 | 0.948531109 | 0.068649766  | 1.1667578 | non-significant | 13.576786 | non-significant | #/NA        | #/NA |
| HNHA                               | 0.7000541 | 0.949531265 | 0.067315747  | 1.1440851 | non-significant | 13.052494 | non-significant | #/NA        | #/NA |
| Ascorbic acid                      | 0.700384  | 0.949978672 | 0.066718991  | 1.1339427 | non-significant | 13.848459 | non-significant | #/NA        | #/NA |
| JGB1741                            | 0.7004477 | 0.950065049 | 0.06660378   | 1.1319846 | non-significant | 12.879091 | non-significant | #/NA        | #/NA |
| Protocatechuic acid                | 0.701093  | 0.950940384 | 0.065436249  | 1.1121415 | non-significant | 13.703954 | non-significant | #/NA        | #/NA |
| NSC 18804                          | 0.7017944 | 0.95189175  | 0.064167306  | 1.0905748 | non-significant | 12.177925 | non-significant | #/NA        | #/NA |
| Diludin                            | 0.7022459 | 0.952504193 | 0.063350424  | 1.0766912 | non-significant | 14.062481 | non-significant | #/NA        | #/NA |
| CPD000449326_4-Thiazolidinecarboxy | 0.7036179 | 0.954365045 | 0.06068398   | 1.0345072 | non-significant | 13.533864 | non-significant | #/NA        | #/NA |
| CPD000466276_1H-Imidazol-2-amine,  | 0.7043738 | 0.955390382 | 0.059500793  | 1.0112637 | non-significant | 13.200455 | non-significant | #/NA        | #/NA |
| D-?-Tocopherylquinone              | 0.7046104 | 0.955711287 | 0.059072766  | 1.003989  | non-significant | 14.383259 | non-significant | #/NA        | #/NA |
| MINOXIDIL                          | 0.7047903 | 0.955955268 | 0.058747343  | 0.9984582 | non-significant | 13.890222 | non-significant | #/NA        | #/NA |
| NSC 170984                         | 0.7056037 | 0.957058535 | 0.057275793  | 0.973448  | non-significant | 13.721542 | non-significant | #/NA        | #/NA |
| EHNA?HCl                           | 0.705843  | 0.957383161 | 0.056842803  | 0.966089  | non-significant | 13.723097 | non-significant | #/NA        | #/NA |
| CPD000058212_NICOTINAMIDE          | 0.7062482 | 0.957932787 | 0.056109706  | 0.9536294 | non-significant | 13.310156 | non-significant | #/NA        | #/NA |
| Canthaxanthin                      | 0.7067149 | 0.958565759 | 0.05526544   | 0.9392805 | non-significant | 12.625416 | non-significant | #/NA        | #/NA |
| L-Ergothioneine                    | 0.7070655 | 0.959041276 | 0.054631191  | 0.9285009 | non-significant | 13.561904 | non-significant | #/NA        | #/NA |
| 2-Deoxyglucose                     | 0.7071187 | 0.959113397 | 0.054534966  | 0.926866  | non-significant | 13.80853  | non-significant | #/NA        | #/NA |
| NSC 4972                           | 0.7077556 | 0.95997732  | 0.053382685  | 0.9072815 | non-significant | 14.692047 | non-significant | #/NA        | #/NA |
| Licochalcone A                     | 0.7083841 | 0.960829732 | 0.052245729  | 0.887958  | non-significant | 15.427902 | non-significant | #/NA        | #/NA |
| Bakuchiol                          | 0.7090854 | 0.961780983 | 0.05097694   | 0.8663939 | non-significant | 14.106679 | non-significant | #/NA        | #/NA |
| I-BET                              | 0.7096266 | 0.962515062 | 0.049997817  | 0.849753  | non-significant | 14.530053 | non-significant | #/NA        | #/NA |
| PHENETHYL CAFFEATE (CAPE)          | 0.7100709 | 0.963117745 | 0.049193952  | 0.8360906 | non-significant | 13.344736 | non-significant | #/NA        | #/NA |
| Dibutylryl cAMP?Na                 | 0.7104859 | 0.963680545 | 0.048443283  | 0.8233324 | non-significant | 15.123536 | non-significant | #/NA        | #/NA |
| Cl-Amidine                         | 0.7121436 | 0.965929094 | 0.045444145  | 0.7723597 | non-significant | 13.327965 | non-significant | #/NA        | #/NA |
| EBSELEN                            | 0.7125793 | 0.966519982 | 0.044656012  | 0.7589647 | non-significant | 14.191429 | non-significant | #/NA        | #/NA |
| RETINYL PALMITATE                  | 0.7130041 | 0.967096228 | 0.043887408  | 0.7459017 | non-significant | 14.411791 | non-significant | #/NA        | #/NA |
| Tetramethylpyrazine                | 0.7141056 | 0.968590295 | 0.041894606  | 0.7120324 | non-significant | 13.692422 | non-significant | #/NA        | #/NA |
| DMOG                               | 0.7145533 | 0.969197541 | 0.041084655  | 0.6982666 | non-significant | 13.807448 | non-significant | #/NA        | #/NA |
| EUGENOL                            | 0.7145708 | 0.969221201 | 0.041053097  | 0.6977303 | non-significant | 14.460091 | non-significant | #/NA        | #/NA |
| Suramin (sodium salt)              | 0.7145882 | 0.969244774 | 0.041021655  | 0.6971959 | non-significant | 14.49206  | non-significant | #/NA        | #/NA |
| Pimelic Diphenylamide 106          | 0.7147738 | 0.969496613 | 0.040685749  | 0.6914869 | non-significant | 12.925041 | non-significant | #/NA        | #/NA |
| GENTISIC ACID                      | 0.7149077 | 0.969678204 | 0.040443542  | 0.6873704 | non-significant | 12.976569 | non-significant | #/NA        | #/NA |
| CAPSAICIN                          | 0.7151177 | 0.969963046 | 0.040063616  | 0.6809133 | non-significant | 15.802715 | non-significant | #/NA        | #/NA |
| F-Amidine (trifluoroacetate salt)  | 0.7170142 | 0.972535325 | 0.036632682  | 0.6226018 | non-significant | 14.358549 | non-significant | #/NA        | #/NA |
| MELATONIN                          | 0.7189995 | 0.975228202 | 0.033040893  | 0.5615565 | non-significant | 13.296126 | non-significant | #/NA        | #/NA |
| Tenovin-1                          | 0.7201312 | 0.976763166 | 0.030993542  | 0.5267601 | non-significant | 14.187049 | non-significant | #/NA        | #/NA |
| S-Adenosylhomocysteine             | 0.7208613 | 0.97775351  | 0.02967261   | 0.5043098 | non-significant | 13.492445 | non-significant | #/NA        | #/NA |
| D-?-Tocopherol                     | 0.7209514 | 0.977875719 | 0.029509606  | 0.5015394 | non-significant | 14.238019 | non-significant | #/NA        | #/NA |
| Anethole trithione                 | 0.7213154 | 0.978369444 | 0.02885107   | 0.4903471 | non-significant | 13.27882  | non-significant | #/NA        | #/NA |
| Apigenin                           | 0.7219271 | 0.979199125 | 0.027744434  | 0.4715389 | non-significant | 15.994701 | non-significant | #/NA        | #/NA |
| CPD000466338_TEMOZOLOMIDE          | 0.7225618 | 0.980059946 | 0.026596261  | 0.4520248 | non-significant | 13.740581 | non-significant | #/NA        | #/NA |
| Tocopherol succinate               | 0.7235018 | 0.981334968 | 0.024895623  | 0.4231211 | non-significant | 15.110349 | non-significant | #/NA        | #/NA |
| (?-Nephanocin A                    | 0.7236929 | 0.981594114 | 0.024549971  | 0.4172464 | non-significant | 15.092096 | non-significant | #/NA        | #/NA |
| 8-CPT-cAMP?Na                      | 0.7259161 | 0.984609572 | 0.02052792   | 0.3488885 | non-significant | 13.717633 | non-significant | #/NA        | #/NA |
| CARBAMAZEPINE                      | 0.7266267 | 0.985573416 | 0.019242334  | 0.3270389 | non-significant | 15.432225 | non-significant | #/NA        | #/NA |
| CAY10603                           | 0.7281017 | 0.987574069 | 0.016573841  | 0.2816857 | non-significant | 20.718845 | inhibitor       | #/NA        | #/NA |
| NITRENDIPINE                       | 0.7283571 | 0.987920558 | 0.016111691  | 0.2738311 | non-significant | 13.701487 | non-significant | #/NA        | #/NA |
| Niguldipine                        | 0.7285959 | 0.988244441 | 0.015679693  | 0.2664889 | non-significant | 14.74542  | non-significant | #/NA        | #/NA |
| 2',3',5'-triacetyl-5-Azacytidine   | 0.7294329 | 0.989379719 | 0.014165446  | 0.2407531 | non-significant | 13.275429 | non-significant | #/NA        | #/NA |
| TOLAZAMIDE                         | 0.7300159 | 0.990170538 | 0.013110643  | 0.228259  | non-significant | 13.586633 | non-significant | #/NA        | #/NA |
| Splintomicin                       | 0.7317913 | 0.992578516 | 0.009898855  | 0.168239  | non-significant | 13.982233 | non-significant | #/NA        | #/NA |
| Rilmepidine                        | 0.7329386 | 0.994134687 | 0.007823218  | 0.1329619 | non-significant | 14.145357 | non-significant | #/NA        | #/NA |
| ISOLQUIRITIGENIN                   | 0.7332201 | 0.994516591 | 0.00731383   | 0.1243044 | non-significant | 13.689336 | non-significant | #/NA        | #/NA |
| Ferulic acid ethylester            | 0.7337378 | 0.995273748 | 0.006303926  | 0.1071403 | non-significant | 14.160967 | non-significant | #/NA        | #/NA |
| NDGA                               | 0.735594  | 0.997736439 | 0.003019162  | 0.0513131 | non-significant | 13.295177 | non-significant | #/NA        | #/NA |
| 3-METHYL-1-PHENYL-2-PYRAZOLIN-     | 0.7362283 | 0.998596717 | 0.001871714  | 0.0318113 | non-significant | 13.110185 | non-significant | #/NA        | #/NA |
| SB-202190                          | 0.7365781 | 0.999071204 | 0.001238839  | 0.0210551 | non-significant | 15.052851 | non-significant | #/NA        | #/NA |
| DMSO                               | 0.7372628 | 1           | 0            | NA        | NA              | 14.11855  | non-significant | 0.763576208 | NO   |
| L-690_330                          | 0.737532  | 1.000365131 | -0.000487015 | -0.008277 | non-significant | 16.199327 | non-significant | #/NA        | #/NA |
| Dacinosat                          | 0.7384254 | 1.001576868 | -0.002103244 | -0.035746 | non-significant | 17.197464 | inhibitor       | #/NA        | #/NA |
| Zebularine                         | 0.7389284 | 1.002259108 | -0.003013223 | -0.051212 | non-significant | 14.284189 | non-significant | #/NA        | #/NA |
| CPD000469175_IMATINIB MESYLATE     | 0.7389481 | 1.002285817 | -0.003048847 | -0.051818 | non-significant | 17.394754 | inhibitor       | #/NA        | #/NA |
| NSC 62794                          | 0.7401878 | 1.003967255 | -0.005291567 | -0.089934 | non-significant | 14.604843 | non-significant | #/NA        | #/NA |
| Trolox                             | 0.7401939 | 1.003975567 | -0.005302655 | -0.090123 | non-significant | 14.079224 | non-significant | #/NA        | #/NA |
| EPIGALLOCATECHIN-3-MONOGLALLA      | 0.7419143 | 1.006309032 | -0.008415056 | -0.143021 | non-significant | 15.198126 | non-significant | #/NA        | #/NA |
| VERAPAMIL HYDROCHLORIDE            | 0.7421686 | 1.006654052 | -0.008875247 | -0.150842 | non-significant | 14.749147 | non-significant | #/NA        | #/NA |
| TEMPOL                             | 0.742277  | 1.006801056 | -0.009071323 | -0.154174 | non-significant | 13.785905 | non-significant | #/NA        | #/NA |
| Suramin?6Na                        | 0.7441885 | 1.009393755 | -0.012529492 | -0.212949 | non-significant | 15.017659 | non-significant | #/NA        | #/NA |
| HBEDA?HClA?H2O                     | 0.7445128 | 1.009833578 | -0.013116133 | -0.222919 | non-significant | 13.811366 | non-significant | #/NA        | #/NA |
| PX105684                           | 0.7457386 | 1.011496244 | -0.015333815 | -0.26061  | non-significant | 17.130965 | inhibitor       | #/NA        | #/NA |
| 2,4-DPD                            | 0.7474539 | 1.013822872 | -0.018437097 | -0.313353 | non-significant | 13.670234 | non-significant | #/NA        | #/NA |
| VALPROATE SODIUM                   | 0.7477982 | 1.014289829 | -0.019059929 | -0.323939 | non-significant | 13.161775 | non-significant | #/NA        | #/NA |
| 5147472                            | 0.7479042 | 1.014433594 | -0.019251685 | -0.327198 | non-significant | 14.755466 | non-significant | #/NA        | #/NA |
| Mefformin?HCl                      | 0.7481351 | 1.014746845 | -0.019669502 | -0.334299 | non-significant | 12.672044 | non-significant | #/NA        | #/NA |
| THIOCTIC ACID                      | 0.7490502 | 1.015987973 | -0.021324932 | -0.362434 | non-significant | 15.066169 | non-significant | #/NA        | #/NA |
| Chidamide                          | 0.7493478 | 1.016391668 | -0.021863385 | -0.371586 | non-significant | 16.529833 | non-significant | #/NA        | #/NA |
| CDC                                | 0.7535984 | 1.022157015 | -0.029553267 | -0.502281 | non-significant | 14.959331 | non-significant | #/NA        | #/NA |
| 3-Deazaneplanocin A                | 0.7538187 | 1.022455865 | -0.029951876 | -0.509056 | non-significant | 15.300576 | non-significant | #/NA        | #/NA |
| Scriptaid                          | 0.7559996 | 1.025413962 | -0.033897419 | -0.576114 | non-significant | 20.230442 | inhibitor       | #/NA        | #/NA |
| GENISTEIN                          | 0.7570347 | 1.026817921 | -0.035770034 | -0.60794  | non-significant | 13.756717 | non-significant | #/NA        | #/NA |
| Seratrostat                        | 0.7585029 | 1.028809278 | -0.038426129 | -0.653083 | non-significant | 12.779962 | non-significant | #/NA        | #/NA |
| 4-iodo-SAHA                        | 0.7600864 | 1.030957099 | -0.041290916 | -0.701772 | non-significant | 16.240431 | non-significant | #/NA        | #/NA |
| NSC 401077                         | 0.760324  | 1.031279361 | -0.041720752 | -0.709078 | non-significant | 13.008035 | non-significant | #/NA        | #/NA |
| NVP-LBH589                         | 0.761611  | 1.033025026 | -0.044049139 | -0.74865  | non-significant | 18.713396 | inhibitor       | #/NA        | #/NA |
| CAFFEINE                           | 0.7650943 | 1.037749664 | -0.050350912 | -0.855754 | non-significant | 14.199144 | non-significant | #/NA        | #/NA |
| Trichostatin A                     | 0.7661821 | 1.039225222 | -0.052319027 | -0.889204 | non-significant | 18.536443 | inhibitor       | #/NA        | #/NA |
| HYDROQUINONE                       | 0.7669827 | 1.040229743 | -0.053658868 | -0.911975 | non-significant | 13.060518 | non-significant | #/NA        | #/NA |
| NIMODIPINE                         | 0.7682313 | 1.042004648 | -0.056026256 | -0.952211 | non-significant | 14.066964 | non-significant | #/NA        | #/NA |
| LY 294002                          | 0.7755873 | 1.051982032 | -0.069334199 | -1.17839  | non-significant | 13.702093 | non-significant | #/NA        | #/NA |
| Hydroxychloroquine                 | 0.7771176 | 1.054136897 | -0.072208381 | -1.227239 | non-significant | 14.045034 | non-significant | #/NA        | #/NA |
| ETXA                               | 0.7796496 | 1.057492019 | -0.076683479 | -1.303297 | non-significant | 15.026039 | non-significant | #/NA        | #/NA |
| CBHA                               | 0.7927508 | 1.075262178 | -0.100385511 | -1.706132 | non-significant | 20.865427 | inhibitor       | #/NA        | #/NA |
| ETHOXYQUIN                         | 0.7966318 | 1.080526141 | -0.107406642 | -1.825462 | non-significant | 14.50667  | non-significant | #/NA        | #/NA |
| NSC 26326                          | 0.8029713 | 1.089124925 | -0.118875794 | -2.020389 | non-significant | 15.110592 | non-significant | #/NA        | #/NA |

|                                      |           |             |              |           |                 |           |                 |             |      |
|--------------------------------------|-----------|-------------|--------------|-----------|-----------------|-----------|-----------------|-------------|------|
| SAHA                                 | 0.8036859 | 1.090094133 | -0.120168534 | -2.042361 | non-significant | 20.38805  | inhibitor       | #N/A        | #N/A |
| n-Octyl caffeate                     | 0.8057866 | 1.092943473 | -0.123969014 | -2.106953 | non-significant | 16.966887 | inhibitor       | #N/A        | #N/A |
| AGK2                                 | 0.8134501 | 1.103338048 | -0.137833412 | -2.342589 | non-significant | 16.32571  | non-significant | #N/A        | #N/A |
| CYCLOHEXIMIDE                        | 0.8429947 | 1.143411287 | -0.191283533 | -3.251017 | inhibitor       | 18.869563 | inhibitor       | 0.826837469 | NO   |
| U74389G maleate                      | 0.8635296 | 1.171264187 | -0.228434033 | -3.882419 | inhibitor       | 16.401557 | non-significant | 0.926349295 | YES  |
| Tubastatin A (trifluoroacetate salt) | 0.8732561 | 1.184456911 | -0.246030633 | -4.181488 | inhibitor       | 20.39129  | inhibitor       | 0.798336888 | NO   |
| ALLN                                 | 0.8844253 | 1.199606531 | -0.26623736  | -4.524917 | inhibitor       | 28.37093  | inhibitor       | 0.857586629 | NO   |
| MG132                                | 0.9196539 | 1.247389418 | -0.329970694 | -5.608116 | inhibitor       | 49.557645 | inhibitor       | 0.789265    | NO   |
| Curcumin                             | 0.9772698 | 1.32553788  | -0.434205961 | -7.379678 | inhibitor       | 16.663749 | non-significant | 2.697478274 | YES  |
| NICLOSAMIDE                          | 1.1013045 | 1.493774533 | -0.658601837 | -11.19347 | inhibitor       | -49.30223 | inhibitor       | 0.675069842 | NO   |
| Bafilomycin A1                       | 1.2150858 | 1.648103969 | -0.864448116 | -14.69199 | inhibitor       | 106.21429 | inhibitor       | 0.865698976 | NO   |
| CPD000469152_TERBINAFINE HCl         | 1.4206071 | 1.926866562 | -1.236264691 | -21.01131 | inhibitor       | -20.11502 | inhibitor       | 0.759322914 | NO   |
| GF 109203X                           | 3.4106494 | 4.62609697  | -4.836527537 | -82.20066 | inhibitor       | -40.01382 | inhibitor       | 10.40788771 | YES  |



Figure 5-source data

| Compound                            | Primary GFP<br>#N/A | Primary Group<br>enhancer puncta | Primary Z-score<br>#N/A | RFP_9H<br>#N/A | Secondary Z_score | Standard Error | Secondary Group | plate   | rank | Label              | RFP 9H unlabelled<br>#N/A | intrinsic fluorescence<br>#N/A |
|-------------------------------------|---------------------|----------------------------------|-------------------------|----------------|-------------------|----------------|-----------------|---------|------|--------------------|---------------------------|--------------------------------|
| Torin1                              |                     |                                  |                         | 0.16264        | 12.77375092       | 0.004073812    | enhancer        | plate 1 | 1    | Torin1             | #N/A                      | #N/A                           |
| Digoxigenin                         | 0.25636422          | enhancer                         | 3.495227252             | 0.47716        | 10.46955572       | 0.010182837    | enhancer        | plate 2 | 2    | Digoxigenin        | #N/A                      | NO                             |
| CICLOPIROX OLAMINE                  | 0.41788536          | non-significant                  | 2.96994629              | 0.53114        | 4.386733894       | 0.008868595    | enhancer        | plate 1 | 3    | Ciclopirox Olamine | 0.826837469               | NO                             |
| Lanatoside C                        | 0.41026219          | enhancer                         | 5.593446654             | 0.53402        | 7.475024566       | 0.006147924    | enhancer        | plate 2 | 4    |                    | 0.62992903                | NO                             |
| MITOXANTHRONE HYDROCHLORIDE         | 0.84579253          | enhancer                         | 6.011118446             | 0.54139        | 7.08712015        | 0.014294841    | enhancer        | plate 2 | 5    |                    | 0.709758632               | YES                            |
| Clofilium tosylate                  | 0.62546852          | enhancer                         | 6.509612658             | 0.57243        | 3.497538865       | 0.028649703    | enhancer        | plate 1 | 6    | Clofilium tosylate | #N/A                      | NO                             |
| Proscillaridin A                    | 0.44034228          | enhancer                         | 7.245694819             | 0.57332        | 5.405245334       | 0.002805423    | enhancer        | plate 2 | 7    |                    | 0.724563422               | NO                             |
| ASTEMIZOLE                          | 0.36700274          | enhancer                         | 3.81960912              | 0.57944        | 3.33875375        | 0.017360156    | enhancer        | plate 1 | 8    | Astemizole         | #N/A                      | NO                             |
| CLIOQUINOL                          | 0.32256505          | enhancer                         | 4.397798441             | 0.5915         | 3.065859359       | 0.028559644    | enhancer        | plate 1 | 9    |                    | #N/A                      | NO                             |
| Irinotecan hydrochloride trihydrate | 0.4780429           | enhancer puncta                  | 6.51755767              | 0.59903        | 2.89538224        | n=1 due to art | non-significant | plate 1 | 11   |                    | #N/A                      | #N/A                           |
| CAMPTOTHECIN                        | 0.6053243           | enhancer                         | 6.299959084             | 0.61347        | 2.568519237       | 0.013899469    | non-significant | plate 1 | 12   |                    | #N/A                      | #N/A                           |
| Benidipine hydrochloride            | 0.48895442          | enhancer                         | 8.045592404             | 0.61504        | 3.208069089       | 0.036972787    | enhancer        | plate 2 | 13   |                    | 5.691125987               | NO                             |
| PERHILXINE MALEATE                  | 0.47856857          | enhancer                         | 4.980739055             | 0.61811        | 2.463469972       | 0.03632359     | non-significant | plate 1 | 14   |                    | #N/A                      | #N/A                           |
| Thiethylperazine dimalate           | 0.48550856          | enhancer puncta                  | 7.988891758             | 0.61837        | 3.033011481       | 0.003838942    | enhancer        | plate 2 | 15   |                    | 0.703863488               | NO                             |
| Hemicholinium bromide               | -0.4531873          | inhibitor                        | -3.220840366            | 0.62241        | 2.366101252       | 0.034648778    | non-significant | plate 1 | 16   |                    | #N/A                      | #N/A                           |
| Pinaverium bromide                  | 0.42260348          | enhancer                         | 5.761705784             | 0.62308        | 2.784758671       | 0.007543822    | non-significant | plate 2 | 17   |                    | 0.739777393               | #N/A                           |
| DEQUALINIUM CHLORIDE                | 0.41039736          | non-significant                  | 2.916728428             | 0.62308        | 2.350888112       | 0.020482559    | non-significant | plate 1 | 18   |                    | #N/A                      | #N/A                           |
| METHYLBENZETHONIUM CHLORIDE         | 0.91268008          | enhancer                         | 12.44332903             | 0.62409        | 2.731418006       | 0.009049888    | non-significant | plate 2 | 19   |                    | 0.783967327               | #N/A                           |
| PAROXETINE HYDROCHLORIDE            | 0.34198959          | enhancer                         | 4.662629355             | 0.631          | 2.171653741       | 0.008318707    | non-significant | plate 1 | 20   |                    | #N/A                      | #N/A                           |
| FLUPHENAZINE HYDROCHLORIDE          | -0.2896035          | inhibitor                        | -3.014070173            | 0.63136        | 2.163477921       | 0.007101667    | non-significant | plate 1 | 21   |                    | #N/A                      | #N/A                           |
| MONOBENZONE                         | -0.2440303          | inhibitor                        | -3.327068637            | 0.63386        | 2.106808577       | 0.005542692    | non-significant | plate 1 | 22   |                    | #N/A                      | #N/A                           |
| Chlorhexidine                       | 0.75528286          | enhancer                         | 7.860664256             | 0.63522        | 2.076073695       | 0.017631397    | non-significant | plate 1 | 24   |                    | #N/A                      | #N/A                           |
| Mometasone furoate                  | 0.49105052          | enhancer puncta                  | 3.489937207             | 0.63897        | 1.991259899       | 0.012581924    | non-significant | plate 1 | 26   |                    | #N/A                      | #N/A                           |
| MFLQQUINE                           | 0.3319713           | enhancer                         | 3.455016753             | 0.6419         | 1.924889799       | 0.012698719    | non-significant | plate 1 | 27   |                    | #N/A                      | #N/A                           |
| Melengestrol acetate                | 0.20525549          | enhancer                         | 3.377414955             | 0.64303        | 1.899280564       | 0.018564834    | non-significant | plate 1 | 28   |                    | #N/A                      | #N/A                           |
| CPD00059165 BESTATIN                | 0.23670364          | enhancer                         | 3.894884553             | 0.64317        | 1.896111818       | 0.014925094    | non-significant | plate 1 | 29   |                    | #N/A                      | #N/A                           |
| CLEMASTINE                          | 0.75579044          | enhancer                         | 7.865946968             | 0.6433         | 1.893174968       | 0.006520221    | non-significant | plate 1 | 30   |                    | #N/A                      | #N/A                           |
| Scitriclopride hydrochloride        | 0.24723435          | enhancer                         | 3.37075221              | 0.64352        | 1.888199675       | n=1 due to art | non-significant | plate 1 | 31   |                    | #N/A                      | #N/A                           |
| DIRITHROMYCIN                       | -0.516454           | inhibitor                        | -3.670484376            | 0.64372        | 1.883691041       | 0.005478418    | non-significant | plate 1 | 32   |                    | #N/A                      | #N/A                           |
| THIODIAZINE HYDROCHLORIDE           | 0.92542359          | enhancer                         | 9.631416999             | 0.64833        | 1.79263613        | 0.00935512     | non-significant | plate 1 | 33   |                    | #N/A                      | #N/A                           |
| Geftinib                            | 0.31400324          | enhancer                         | 4.281068174             | 0.64863        | 1.72553124        | 0.017491893    | non-significant | plate 1 | 34   |                    | #N/A                      | #N/A                           |
| CPD00469186 NELFINAVIR MESYLA       | 0.60961928          | enhancer                         | 10.03109499             | 0.64872        | 1.434189959       | 0.005796663    | non-significant | plate 2 | 35   |                    | 0.845214443               | #N/A                           |
| PromethazineA7HCl                   | 0.33508446          | enhancer                         | 4.568486038             | 0.65235        | 1.688334175       | 0.008751662    | non-significant | plate 1 | 36   |                    | #N/A                      | #N/A                           |
| Penbutolol sulfate                  | 0.28373084          | enhancer                         | 4.668702478             | 0.6529         | 1.675885365       | 0.023065261    | non-significant | plate 1 | 37   |                    | #N/A                      | #N/A                           |
| Ethynodiol diacetate                | 0.27073023          | enhancer                         | 3.691091086             | 0.65298        | 1.674142663       | 0.012057412    | non-significant | plate 1 | 38   |                    | #N/A                      | #N/A                           |
| Cytosporin A                        | 0.53868835          | enhancer                         | 3.82850326              | 0.65708        | 0.994190768       | 0.002990588    | non-significant | plate 2 | 39   |                    | #N/A                      | #N/A                           |
| GBR 12099 dihydrochloride           | 0.46558538          | enhancer                         | 3.308954362             | 0.65874        | 0.906674981       | 0.008310192    | non-significant | plate 2 | 40   |                    | #N/A                      | #N/A                           |
| IDAZOXAN HYDROCHLORIDE              | 0.43701528          | enhancer                         | 5.958193892             | 0.65879        | 0.904110495       | 0.006644269    | non-significant | plate 2 | 41   |                    | 0.703511717               | #N/A                           |
| AMINACRINE                          | 0.58954185          | enhancer puncta                  | 9.700727096             | 0.65934        | 0.874869912       | 0.00767841     | non-significant | plate 2 | 42   |                    | #N/A                      | #N/A                           |
| Halofantrine hydrochloride          | 0.23789425          | enhancer puncta                  | 3.914475583             | 0.65976        | 1.520618611       | 0.010880006    | non-significant | plate 1 | 43   |                    | #N/A                      | #N/A                           |
| TENOXCAM                            | -0.4628417          | inhibitor                        | -3.289454428            | 0.66007        | 0.83671378        | 0.007413766    | non-significant | plate 2 | 44   |                    | #N/A                      | #N/A                           |
| FLUNARIZINE HYDROCHLORIDE           | 0.64299025          | enhancer                         | 6.691970378             | 0.6622         | 1.465464387       | 0.024622534    | non-significant | plate 1 | 45   |                    | #N/A                      | #N/A                           |
| TOBRAMYCIN                          | -0.5303392          | inhibitor                        | -3.769165056            | 0.66424        | 1.419107467       | n=1 due to art | non-significant | plate 1 | 46   |                    | #N/A                      | #N/A                           |
| Tetramisole hydrochloride           | -0.5162222          | inhibitor                        | -3.668834442            | 0.66447        | 1.414032045       | 0.008947285    | non-significant | plate 1 | 47   |                    | #N/A                      | #N/A                           |
| BIFONAZOLE                          | 0.21800455          | enhancer                         | 3.587196739             | 0.66468        | 1.409117127       | 0.025988512    | non-significant | plate 1 | 48   |                    | #N/A                      | #N/A                           |
| FLUVOXAMINE MALEATE                 | 0.32104921          | enhancer                         | 5.282764564             | 0.66519        | 0.566827818       | 0.005992063    | non-significant | plate 2 | 49   |                    | 0.793409498               | #N/A                           |
| (R)-Duloxetine hydrochloride        | 0.57712202          | enhancer puncta                  | 9.496362611             | 0.66606        | 0.521208207       | 0.008358478    | non-significant | plate 2 | 50   |                    | #N/A                      | #N/A                           |
| CHLOROQUINE DIPHOSSPHATE            | -0.5833479          | inhibitor                        | -4.145902448            | 0.6677         | 1.340827563       | 0.00579674     | non-significant | plate 1 | 51   |                    | #N/A                      | #N/A                           |
| CPD004669290 SAQUINAVIR MESYLA      | 0.21267557          | enhancer                         | 3.499510193             | 0.668          | 1.334098643       | 0.026679059    | non-significant | plate 1 | 52   |                    | #N/A                      | #N/A                           |
| DOXEPIN HYDROCHLORIDE               | 0.22495944          | enhancer                         | 3.701637312             | 0.66801        | 1.339302386       | 0.017939504    | non-significant | plate 1 | 53   |                    | #N/A                      | #N/A                           |
| NSC 257473                          | 0.44433951          | enhancer                         | 4.614089982             | 0.66888        | 1.316006399       | 0.008627397    | non-significant | plate 1 | 54   |                    | #N/A                      | #N/A                           |
| Azacytidine-5                       | 0.79363653          | enhancer                         | 10.82038098             | 0.67014        | 0.306090694       | 0.004012635    | non-significant | plate 2 | 55   |                    | #N/A                      | #N/A                           |
| PROADIFEN HYDROCHLORIDE             | 0.26017043          | enhancer                         | 3.547120518             | 0.67015        | 1.285456158       | 0.025991715    | non-significant | plate 1 | 56   |                    | #N/A                      | #N/A                           |
| Dipivefrin hydrochloride            | -0.4963286          | inhibitor                        | -3.527448987            | 0.67104        | 1.265283638       | 0.020205056    | non-significant | plate 1 | 57   |                    | #N/A                      | #N/A                           |
| PERHPHENAZINE                       | 0.61889574          | enhancer                         | 6.441204919             | 0.67111        | 1.263577994       | 0.014966306    | non-significant | plate 1 | 58   |                    | 0.763576208               | #N/A                           |
| Bisoprolol fumarate                 | -0.4232085          | inhibitor                        | -3.007778244            | 0.67297        | 1.221470404       | 0.016814371    | non-significant | plate 1 | 59   |                    | #N/A                      | #N/A                           |
| Quipazine dimaleate salt            | -0.4779633          | inhibitor                        | -3.396925118            | 0.673          | 1.22091623        | 0.012829153    | non-significant | plate 1 | 60   |                    | #N/A                      | #N/A                           |
| CPD00466343 LETROZOL                | 0.5367188           | enhancer puncta                  | 8.831540259             | 0.67301        | 0.155220623       | 0.006300384    | non-significant | plate 2 | 61   |                    | #N/A                      | #N/A                           |
| ASPIRIN                             | 0.21685811          | enhancer                         | 3.56833246              | 0.67357        | 1.207939524       | 0.007620018    | non-significant | plate 1 | 62   |                    | #N/A                      | #N/A                           |
| CPD00466368 GLIMEPIRIDE             | 0.32146808          | enhancer                         | 5.63715525              | 0.67404        | 1.19743859        | 0.025925192    | non-significant | plate 1 | 63   |                    | #N/A                      | #N/A                           |
| CPD00466395 RITONAVIR               | 0.24017315          | enhancer                         | 3.951974192             | 0.6742         | 1.193731544       | 0.012312513    | non-significant | plate 1 | 64   |                    | #N/A                      | #N/A                           |
| Carvedilol                          | 0.2623571           | enhancer                         | 4.316948325             | 0.67424        | 1.192778327       | 0.02024943     | non-significant | plate 1 | 65   |                    | #N/A                      | #N/A                           |
| CHLOROPYRAMINE HYDROCHLORIDE        | 0.42076681          | enhancer puncta                  | 5.736664948             | 0.67506        | 1.174276758       | 0.028189188    | non-significant | plate 1 | 66   |                    | #N/A                      | #N/A                           |
| Telgersod maleate                   | 0.87268382          | enhancer                         | 14.35973987             | 0.67541        | 0.028516983       | 0.00809559     | non-significant | plate 2 | 67   |                    | #N/A                      | #N/A                           |
| DMSO                                | #N/A                | non-significant                  | #N/A                    | 0.67549        | 0.024568329       | 0.002384526    | non-significant | plate 2 | 68   |                    | 1.179184516               | NO                             |
| Hesperidine                         | -0.5090356          | inhibitor                        | -3.617758548            | 0.67568        | 1.160131989       | 0.01214672     | non-significant | plate 1 | 69   |                    | #N/A                      | #N/A                           |
| MITOTANE                            | 0.26411353          | enhancer                         | 4.34590566              | 0.6759         | 1.155127465       | 0.012310531    | non-significant | plate 1 | 70   |                    | #N/A                      | #N/A                           |
| Mirtazapine                         | -0.463698           | inhibitor                        | -3.295540233            | 0.67657        | -0.032160421      | 0.007560238    | non-significant | plate 2 | 71   |                    | #N/A                      | #N/A                           |
| RACECADOTRIL                        | -0.4590654          | inhibitor                        | -3.262616133            | 0.67675        | -0.041885034      | 0.010522678    | non-significant | plate 2 | 72   |                    | #N/A                      | #N/A                           |
| Amnikan hydrate                     | -0.4277658          | inhibitor                        | -3.04016759             | 0.6768         | -0.044592514      | 0.006383934    | non-significant | plate 2 | 73   |                    | #N/A                      | #N/A                           |
| Kanamycin A sulfate                 | -0.4872137          | inhibitor                        | -3.462668889            | 0.6775         | -0.081286417      | 0.011569435    | non-significant | plate 2 | 74   |                    | #N/A                      | #N/A                           |
| CPD00466360 FLUBENDAZOLE            | 0.63493224          | enhancer                         | 8.6565609               | 0.6785         | -0.134107445      | 0.007243105    | non-significant | plate 2 | 75   |                    | #N/A                      | #N/A                           |
| NSC 170984                          | 0.44019962          | enhancer puncta                  | 4.916136748             | 0.6795         | 1.073749974       | 0.013548053    | non-significant | plate 1 | 76   |                    | #N/A                      | #N/A                           |
| Topotecan                           | 0.31810767          | enhancer                         | 5.234362465             | 0.67983        | -0.204124039      | 0.005738607    | non-significant | plate 2 | 77   |                    | #N/A                      | #N/A                           |
| Dexfenfluramine hydrochloride       | -0.5762799          | inhibitor puncta                 | -4.095669882            | 0.68013        | 1.059391628       | 0.01818349     | non-significant | plate 1 | 78   |                    | 0.774482364               | #N/A                           |
| Terazosin hydrochloride             | -0.295138           | inhibitor                        | -4.023862949            | 0.68109        | -0.270595863      | 0.003097366    | non-significant | plate 2 | 79   |                    | #N/A                      | #N/A                           |
| GLUCLAZIDE                          | -0.4935736          | inhibitor                        | -3.507868763            | 0.68122        | -0.27264189       | 0.004194259    | non-significant | plate 2 | 80   |                    | #N/A                      | #N/A                           |
| Anethole trithione                  | 0.24132769          | enhancer                         | 3.970971859             | 0.68136        | -0.284348293      | 0.00563113     | non-significant | plate 2 | 81   |                    | #N/A                      | #N/A                           |
| AC                                  |                     |                                  |                         |                |                   |                |                 |         |      |                    |                           |                                |

|                                    |            |                  |              |         |              |                   |                 |         |     |               |             |      |
|------------------------------------|------------|------------------|--------------|---------|--------------|-------------------|-----------------|---------|-----|---------------|-------------|------|
| LOVASTATIN                         | -0.5262054 | inhibitor        | -3.739785549 | 0.69939 | -1.234096598 | 0.009119661       | non-significant | plate 2 | 103 |               | #N/A        | #N/A |
| Dinoprost trometamol               | -0.4602376 | inhibitor        | -3.270947516 | 0.6996  | 0.618663797  | 0.008638988       | non-significant | plate 1 | 104 |               | #N/A        | #N/A |
| Atorvastatin                       | -0.2042638 | inhibitor        | -3.361097864 | 0.70119 | -1.329020137 | 0.007061163       | non-significant | plate 2 | 105 |               | #N/A        | #N/A |
| SULCONAZOLE NITRATE                | 0.5005188  | enhancer         | 6.823990351  | 0.7015  | -1.345210792 | 0.005644672       | non-significant | plate 2 | 106 |               | #N/A        | #N/A |
| SULFAMETER                         | 0.40672644 | enhancer         | 5.54524086   | 0.70257 | 0.551422953  | 0.008216233       | non-significant | plate 1 | 107 |               | #N/A        | #N/A |
| DO 897/99                          | -0.4865664 | inhibitor        | -3.458068531 | 0.7039  | -1.471513704 | 0.006413292       | non-significant | plate 2 | 108 |               | #N/A        | #N/A |
| OXICONAZOLE NITRATE                | 0.51386189 | enhancer         | 7.00590784   | 0.70466 | -1.511580608 | 0.008578999       | non-significant | plate 2 | 109 |               | #N/A        | #N/A |
| Etoricoxib                         | -0.5956954 | inhibitor        | -4.233657404 | 0.70469 | 0.503599328  | 0.020796188       | non-significant | plate 1 | 110 |               | 0.726130427 | #N/A |
| PROPARACAINE HYDROCHLORIDE         | 0.46583228 | enhancer         | 6.351080169  | 0.70655 | 0.461385483  | 0.010145724       | non-significant | plate 1 | 111 |               | #N/A        | #N/A |
| Estramustine                       | 0.45171892 | enhancer         | 7.432893826  | 0.70711 | -1.6407886   | 0.009831745       | non-significant | plate 2 | 112 |               | #N/A        | #N/A |
| NAFTIFINE HYDROCHLORIDE            | 0.21016172 | enhancer         | 3.458145536  | 0.70755 | 0.438886633  | 0.043722179       | non-significant | plate 1 | 113 |               | #N/A        | #N/A |
| Gestrinone                         | -0.2598281 | inhibitor        | -4.275390281 | 0.70759 | -1.665919394 | 0.01395934        | non-significant | plate 2 | 114 |               | #N/A        | #N/A |
| CPD000336944 mevastatin            | -0.4510806 | inhibitor        | -3.205867895 | 0.71014 | -1.800045968 | 0.004180073       | non-significant | plate 2 | 115 |               | #N/A        | #N/A |
| Tyloxapol                          | 0.42839157 | enhancer         | 5.840619681  | 0.71024 | -1.805697914 | 0.007311768       | non-significant | plate 2 | 116 |               | #N/A        | #N/A |
| HEXACHLOROPHENE                    | 0.67843993 | enhancer         | 11.16351732  | 0.71162 | -1.878132333 | 0.009325885       | non-significant | plate 2 | 118 |               | #N/A        | #N/A |
| Amphotericin B                     | -0.5038243 | inhibitor        | -3.580721237 | 0.71165 | 0.345873361  | 0.012610234       | non-significant | plate 1 | 119 |               | 0.706443472 | #N/A |
| MEBENDAZOLE                        | 0.37593186 | enhancer         | 3.912539619  | 0.71488 | -2.049803369 | 0.004454286       | non-significant | plate 2 | 120 |               | #N/A        | #N/A |
| DILOXANIDE FUROATE                 | 0.23836408 | enhancer         | 3.249816349  | 0.71754 | 0.212573974  | 0.022902366       | non-significant | plate 1 | 121 |               | #N/A        | #N/A |
| CHLORTETRACYCLINE HYDROCHLORIDE    | 0.46579662 | enhancer         | 4.847814096  | 0.71768 | 0.209452285  | 0.019309703       | non-significant | plate 1 | 122 |               | #N/A        | #N/A |
| PRAZOSIN HYDROCHLORIDE             | -0.2837255 | inhibitor        | -3.868266743 | 0.71855 | -2.243398148 | 0.008318949       | non-significant | plate 2 | 123 |               | #N/A        | #N/A |
| TRICLOSAN                          | 0.57623554 | enhancer         | 9.481775926  | 0.7209  | -2.366996431 | 0.01784983        | non-significant | plate 2 | 124 |               | #N/A        | #N/A |
| AMOROLFINE HYDROCHLORIDE           | 0.45026197 | enhancer         | 7.408920167  | 0.72105 | -2.374978195 | 0.026561846       | non-significant | plate 2 | 125 |               | #N/A        | #N/A |
| Bromocryptine mesylate             | 0.41298894 | enhancer         | 4.298214103  | 0.72336 | 0.080958069  | 0.024958997       | non-significant | plate 1 | 126 |               | #N/A        | #N/A |
| Avermectin B1a                     | 0.36715902 | enhancer         | 5.00578527   | 0.72552 | -2.610317469 | 0.01880213        | non-significant | plate 2 | 127 |               | #N/A        | #N/A |
| DMSO                               | #N/A       | non-significant  | #N/A         | 0.72569 | 0.028082996  | 0.004960111       | non-significant | plate 1 | 128 |               | 0.675069842 | NO   |
| DILAZEP DIHYDROCHLORIDE            | -0.5391178 | inhibitor        | -5.610909504 | 0.73351 | -0.14892721  | 0.01791535        | non-significant | plate 1 | 129 |               | #N/A        | #N/A |
| Ivermectin                         | 0.31826256 | enhancer         | 3.31234195   | 0.7349  | -3.104485911 | 0.008257464       | inhibitor       | plate 2 | 130 |               | #N/A        | NO   |
| Haloproglin                        | 0.55120193 | enhancer         | 3.917438312  | 0.73786 | -3.260059023 | 0.01481143        | inhibitor       | plate 2 | 131 |               | #N/A        | NO   |
| Estropipate                        | 0.29819842 | enhancer         | 4.06558783   | 0.73851 | -0.262091035 | 0.020159141       | non-significant | plate 1 | 132 |               | #N/A        | #N/A |
| Alfacalcidol                       | 0.44851495 | enhancer         | 3.187633392  | 0.75281 | -4.047774907 | 0.009385267       | inhibitor       | plate 2 | 133 |               | #N/A        | NO   |
| Clinidipine                        | 0.28226936 | enhancer         | 4.644654177  | 0.7576  | -4.299936095 | 0.011337818       | inhibitor       | plate 2 | 134 |               | #N/A        | NO   |
| CYCLOHEXIMIDE                      | 0.63325095 | enhancer         | 8.633638512  | 0.84598 | -2.694714613 | 0.028425129       | non-significant | plate 1 | 135 | Cyclohexamide | #N/A        | NO   |
| Quinacrine dihydrochloride hydrate | -2.1091858 | inhibitor puncta | -21.95151267 | 0.85718 | -2.948365052 | 0 n=1 due to arti | non-significant | plate 1 | 136 | Quinacrine    | 0.723005469 | #N/A |
| DIACERIN                           | 0.29801344 | enhancer         | 4.063065895  | 0.92739 | -4.537680299 | 0.074528679       | inhibitor       | plate 1 |     | Diacerin      | #N/A        | YES  |
| Nicosamide                         | 0.27756754 | enhancer         | 3.099866314  | 1.10624 | -22.66078712 | 0.026593144       | inhibitor       | plate 2 | 137 | Nicosamide    | #N/A        | NO   |



|                               |                           |              |                                                               |             |            |   |   |   |   |         |              |           |     |           |
|-------------------------------|---------------------------|--------------|---------------------------------------------------------------|-------------|------------|---|---|---|---|---------|--------------|-----------|-----|-----------|
| Uprosertib (GSK2141795)       |                           |              |                                                               |             | 0.5074734  | 0 | 0 | 0 | 0 | Plate 1 | non-signific | 0.0208152 | 99  | 0.0084978 |
| ATM/ATR Kinase Inhibitor      |                           |              |                                                               |             | 0.5085574  | 0 | 0 | 0 | 0 | Plate 2 | non-signific | 0.0693716 | 100 | 0.0346858 |
| CLOMIPRAMINE HYDROCHLORIDE    |                           |              |                                                               |             | 0.5111118  | 0 | 0 | 0 | 0 | Plate 2 | non-signific | 0.0245171 | 101 | 0.0109644 |
| PF-562271 HCl                 |                           |              |                                                               |             | 0.5131386  | 0 | 0 | 0 | 0 | Plate 1 | non-signific | 0.0424039 | 102 | 0.0189636 |
| S 38093                       |                           |              |                                                               |             | 0.51683024 | 0 | 0 | 0 | 0 | Plate 2 | non-signific | 0.0369114 | 103 | 0.0150699 |
| Voxtalib (XL765, SAR245409)   |                           |              |                                                               |             | 0.5172421  | 0 | 0 | 0 | 0 | Plate 1 | non-signific | 0.0128684 | 104 | 0.0074296 |
| A66                           |                           |              |                                                               |             | 0.5172466  | 0 | 0 | 0 | 0 | Plate 2 | non-signific | 0.0183728 | 105 | 0.0091864 |
| Umeclidinium bromide          |                           |              |                                                               |             | 0.5190865  | 0 | 0 | 0 | 0 | Plate 2 | non-signific | 0.0168364 | 106 | 0.0068734 |
| BRL-15572                     |                           |              |                                                               |             | 0.520273   | 0 | 0 | 0 | 0 | Plate 2 | non-signific | 0.0369996 | 107 | 0.0151505 |
| Ivabradine HCl (Procoralan)   |                           |              |                                                               |             | 0.5228112  | 0 | 0 | 0 | 0 | Plate 2 | non-signific | 0.0196975 | 108 | 0.0080415 |
| 3BDO                          |                           |              |                                                               |             | 0.5230816  | 0 | 0 | 0 | 0 | Plate 2 | non-signific | 0.0890363 | 109 | 0.0363489 |
| Tiagabine                     |                           |              |                                                               |             | 0.523709   | 0 | 0 | 0 | 0 | Plate 2 | non-signific | 0.0355613 | 110 | 0.0177807 |
| HarmineA?HCl                  |                           |              |                                                               |             | 0.5273957  | 0 | 0 | 0 | 0 | Plate 2 | non-signific | 0.0399996 | 111 | 0.0163297 |
| Diclofenac Diethylamine       |                           |              |                                                               |             | 0.5286397  | 0 | 0 | 0 | 0 | Plate 2 | non-signific | 0.0411287 | 112 | 0.0167907 |
| LY2886721                     |                           |              |                                                               |             | 0.5305237  | 0 | 0 | 0 | 0 | Plate 2 | non-signific | 0.0306629 | 113 | 0.0125181 |
| DOPAMINE HYDROCHLORIDE        |                           |              |                                                               |             | 0.5306352  | 0 | 0 | 0 | 0 | Plate 2 | non-signific | 0.0239662 | 114 | 0.010718  |
| Benztropine mesylate          |                           |              |                                                               |             | 0.5308342  | 0 | 0 | 0 | 0 | Plate 2 | non-signific | 0.0190298 | 115 | 0.0077689 |
| KN-93 Phosphate               |                           |              |                                                               |             | 0.5310959  | 0 | 0 | 0 | 0 | Plate 2 | non-signific | 0.0304876 | 116 | 0.0136345 |
| Tiotropium Bromide hydrate    |                           |              |                                                               |             | 0.5328715  | 0 | 0 | 0 | 0 | Plate 2 | non-signific | 0.0328545 | 117 | 0.0134128 |
| CPD000466354_LATANOPROST      |                           |              |                                                               |             | 0.5338674  | 0 | 0 | 0 | 0 | Plate 2 | non-signific | 0.0219105 | 118 | 0.0097987 |
| (+)-JQ1                       |                           |              |                                                               |             | 0.5356412  | 0 | 0 | 0 | 0 | Plate 2 | non-signific | 0.0335491 | 119 | 0.0136963 |
| AZD5153                       |                           |              |                                                               |             | 0.5358558  | 0 | 0 | 0 | 0 | Plate 2 | non-signific | 0.0244622 | 120 | 0.0099866 |
| Parecoxib                     |                           |              |                                                               |             | 0.5387881  | 0 | 0 | 0 | 0 | Plate 2 | non-signific | 0.0265972 | 121 | 0.0108583 |
| A-317491                      |                           |              |                                                               |             | 0.5396471  | 0 | 0 | 0 | 0 | Plate 2 | non-signific | 0.0961607 | 122 | 0.0430044 |
| VPS34-IN1                     |                           |              |                                                               |             | 0.5437231  | 0 | 1 | 0 | 0 | Plate 2 | non-signific | 0.0580372 | 123 | 0.0259555 |
| AG-879                        |                           |              |                                                               |             | 0.5442517  | 0 | 0 | 0 | 0 | Plate 1 | non-signific | 0.0253345 | 124 | 0.0113299 |
| OTX015                        |                           |              |                                                               |             | 0.5445233  | 0 | 0 | 0 | 0 | Plate 2 | non-signific | 0.1059149 | 125 | 0.0529574 |
| GSK1324726A (I-BET726)        |                           |              |                                                               |             | 0.5449315  | 0 | 0 | 0 | 0 | Plate 2 | non-signific | 0.0016388 | 126 | 0.0009461 |
| DMSO                          |                           |              |                                                               |             | 0.5464681  | 0 | 0 | 0 | 0 | Plate 1 | Plate 1 DM   | 0.0531326 | 128 | 0.0068029 |
| PROPANTHELINE BROMIDE         |                           |              |                                                               |             | 0.5466069  | 0 | 0 | 0 | 0 | Plate 2 | non-signific | 0.0538555 | 129 | 0.0219862 |
| Oxidopamine (hydrobromide)    |                           |              |                                                               |             | 0.5469577  | 0 | 0 | 0 | 0 | Plate 2 | non-signific | 0.0638848 | 130 | 0.0260809 |
| DMSO                          |                           |              |                                                               |             | 0.5472519  | 0 | 0 | 0 | 0 | Plate 2 | Plate 2 DM   | 0.0342745 | 131 | 0.0045801 |
| MSA36                         |                           |              |                                                               |             | 0.5507526  | 0 | 0 | 0 | 0 | Plate 2 | non-signific | 0.0714562 | 132 | 0.0291719 |
| Methscopolamine (Pamine)      |                           |              |                                                               |             | 0.5510995  | 0 | 0 | 0 | 0 | Plate 2 | non-signific | 0.0233401 | 133 | 0.010438  |
| XL765                         |                           |              |                                                               |             | 0.5515507  | 0 | 0 | 0 | 0 | Plate 2 | non-signific | 0.0411126 | 134 | 0.0167841 |
| SAHA                          |                           |              |                                                               |             | 0.5528182  | 0 | 0 | 0 | 0 | Plate 2 | non-signific | 0.0235614 | 135 | 0.0117807 |
| ERK5-IN-1                     |                           |              |                                                               |             | 0.5533157  | 0 | 0 | 0 | 0 | Plate 2 | non-signific | 0.0147428 | 136 | 0.0060187 |
| M 344                         |                           |              |                                                               |             | 0.5564232  | 0 | 0 | 0 | 0 | Plate 2 | non-signific | 0.0396452 | 137 | 0.0177299 |
| LRRK2-IN-1                    |                           |              |                                                               |             | 0.557018   | 0 | 0 | 0 | 0 | Plate 2 | non-signific | 0.0181447 | 138 | 0.0090723 |
| ABBV-075 (Mivebresib)         |                           |              |                                                               |             | 0.5590692  | 0 | 0 | 0 | 0 | Plate 2 | non-signific | 0.0445941 | 139 | 0.0199431 |
| Bortezomib (Velcade)          |                           |              |                                                               |             | 0.5620114  | 0 | 0 | 0 | 0 | Plate 1 | non-signific | 0.0110632 | 140 | 0.0045165 |
| BMS-708163 (Avagacestat)      |                           |              |                                                               |             | 0.5624521  | 0 | 0 | 0 | 0 | Plate 2 | non-signific | 0.0763341 | 141 | 0.0341376 |
| Resminostat (RAS2410)         |                           |              |                                                               |             | 0.5631163  | 0 | 0 | 0 | 0 | Plate 2 | non-signific | 0.0185052 | 142 | 0.0075547 |
| ACY-1215                      |                           |              |                                                               |             | 0.5633997  | 0 | 0 | 0 | 0 | Plate 2 | non-signific | 0.0595684 | 143 | 0.0243187 |
| AZD3514                       |                           |              |                                                               |             | 0.5640319  | 0 | 0 | 0 | 0 | Plate 2 | non-signific | 0.0323208 | 144 | 0.0131949 |
| PF-4989216                    |                           |              |                                                               |             | 0.5669957  | 0 | 0 | 0 | 0 | Plate 2 | non-signific | 0.0728669 | 145 | 0.0420697 |
| Praicostat (SB939)            |                           |              |                                                               |             | 0.5679025  | 0 | 1 | 0 | 0 | Plate 2 | non-signific | 0.0276636 | 146 | 0.0138318 |
| Ramosetron Hydrochloride      |                           |              |                                                               |             | 0.5712824  | 0 | 0 | 0 | 0 | Plate 2 | non-signific | 0.0596459 | 147 | 0.0243505 |
| SNS-314 Mesylate              |                           |              |                                                               |             | 0.5738762  | 0 | 0 | 0 | 0 | Plate 1 | non-signific | 0.0220959 | 148 | 0.0090206 |
| PHENYLBUTAZONE                |                           |              |                                                               |             | 0.5758878  | 0 | 0 | 0 | 0 | Plate 1 | non-signific | 0.0425207 | 149 | 0.017359  |
| Torin 2                       |                           |              |                                                               |             | 0.5772246  | 0 | 0 | 0 | 0 | Plate 1 | non-signific | 0.0667603 | 150 | 0.0272548 |
| Palomid 529                   |                           |              |                                                               |             | 0.5784134  | 0 | 0 | 0 | 0 | Plate 2 | non-signific | 0.0750008 | 151 | 0.0335414 |
| PFI-1(PF-6405761)             |                           |              |                                                               |             | 0.5794537  | 0 | 0 | 0 | 0 | Plate 2 | non-signific | 0.0157621 | 152 | 0.0064348 |
| PX105684                      |                           |              |                                                               |             | 0.5876016  | 0 | 1 | 0 | 0 | Plate 2 | non-signific | 0.038139  | 153 | 0.0170563 |
| I-BET                         |                           |              |                                                               |             | 0.5970632  | 0 | 0 | 0 | 0 | Plate 2 | non-signific | 0.0442667 | 154 | 0.0221333 |
| NVP-LBH589                    |                           |              |                                                               |             | 0.5981574  | 0 | 1 | 0 | 0 | Plate 2 | non-signific | 0.0332703 | 155 | 0.0148789 |
| PHA-665752                    |                           |              |                                                               |             | 0.5991579  | 0 | 0 | 0 | 0 | Plate 2 | non-signific | 0.0765795 | 156 | 0.0342474 |
| MCCSL-MWW-2-019               |                           |              |                                                               |             | 0.6109399  | 0 | 1 | 0 | 0 | Plate 2 | non-signific | 0.0172352 | 157 | 0.0070362 |
| Dacinostat                    |                           |              |                                                               |             | 0.6113578  | 0 | 1 | 0 | 0 | Plate 2 | non-signific | 0.0471719 | 158 | 0.0192578 |
| IMD0354                       |                           |              |                                                               |             | 0.6127914  | 0 | 0 | 0 | 0 | Plate 1 | non-signific | 0.0936296 | 159 | 0.0418724 |
| Sabutoclax                    |                           |              |                                                               |             | 0.6591429  | 0 | 0 | 0 | 0 | Plate 1 | non-signific | 0.0303162 | 160 | 0.0123765 |
| Citinostat (ACY-241)          |                           |              |                                                               |             | 0.676874   | 0 | 0 | 0 | 0 | Plate 1 | non-signific | 0.0202416 | 161 | 0.0090523 |
| Toosendanin                   | neurotransmission blocker |              |                                                               | preclinical | 0.87035    | 0 | 1 | 0 | 0 | Plate 2 | inhibitor    | 0.0746771 | 162 | 0.0333966 |
| CC-115                        | DNA-PK, mTOR              | glioblastom  | <a href="https://clinic">https://clinic</a>                   | 2           | 3.7413283  | 0 | 1 | 0 | 0 | Plate 1 | inhibitor    | 0         | 164 | 0         |
| Rocuronium bromide            | acetylcholine receptor    |              | approved as                                                   |             | 3.2967386  | 0 | 0 | 0 | 0 | Plate 2 | inhibitor    | 0         | 163 | 0         |
| DAUNOMYCIN HYDROCHLORIDE      | DNA synthesis             | multiple car | <a href="https://www.cancer.gov/">https://www.cancer.gov/</a> |             | -0.296564  | 0 | 1 | 1 | 0 | Plate 2 | inhibitor    | 0         | 165 | 0         |
| Obatoclax Mesylate (GX15-070) | BCL2                      | Lung Canc    | <a href="https://clinic">https://clinic</a>                   | 3           | -0.171788  | 0 | 1 | 1 | 0 | Plate 2 | inhibitor    | 0         | 166 | 0         |

Fig. S1

A

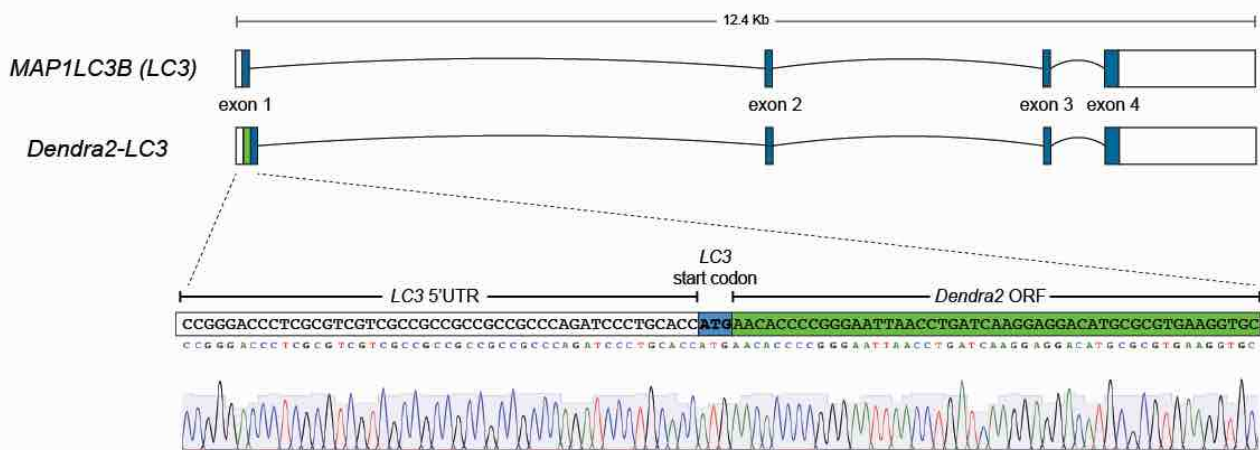

B

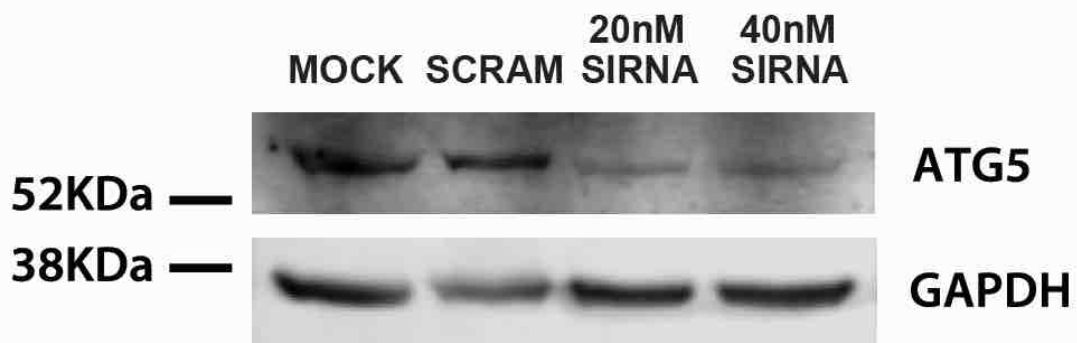

**Fig. S2**

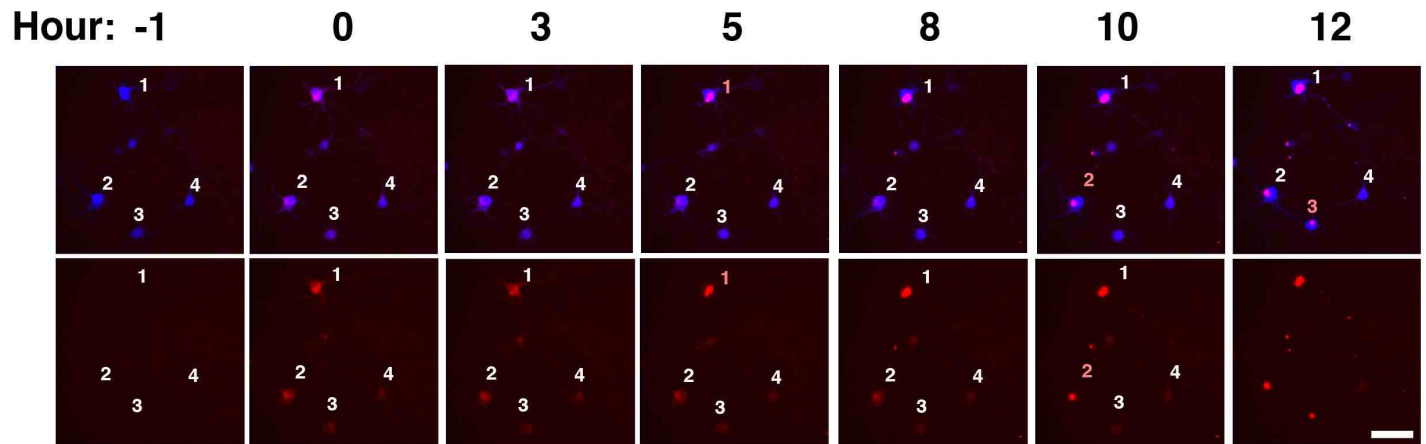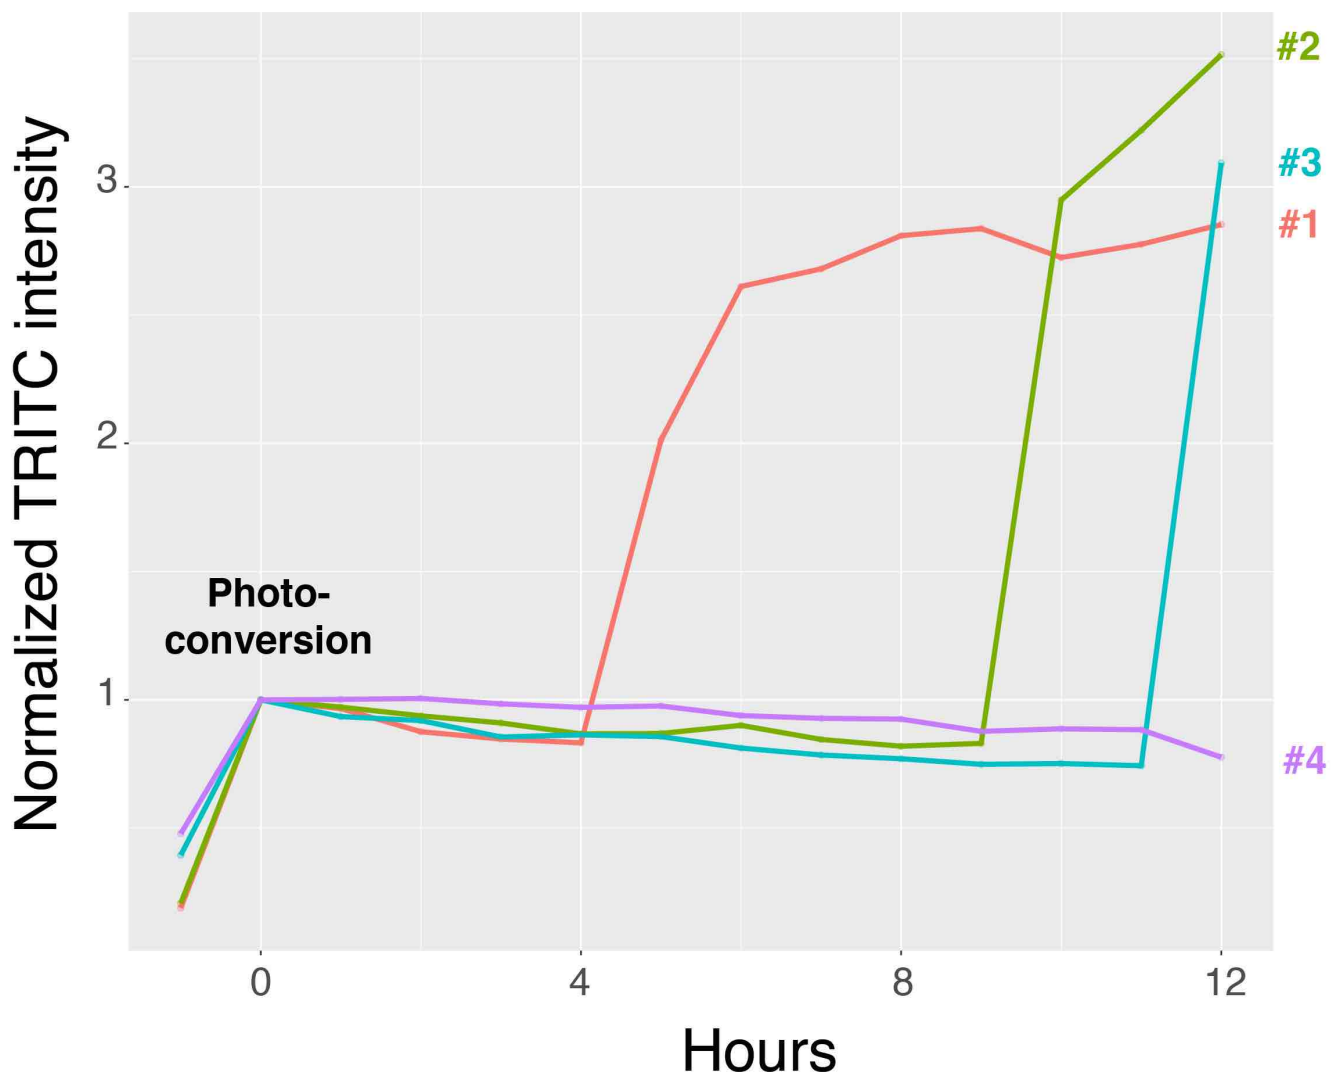

Fig. S3

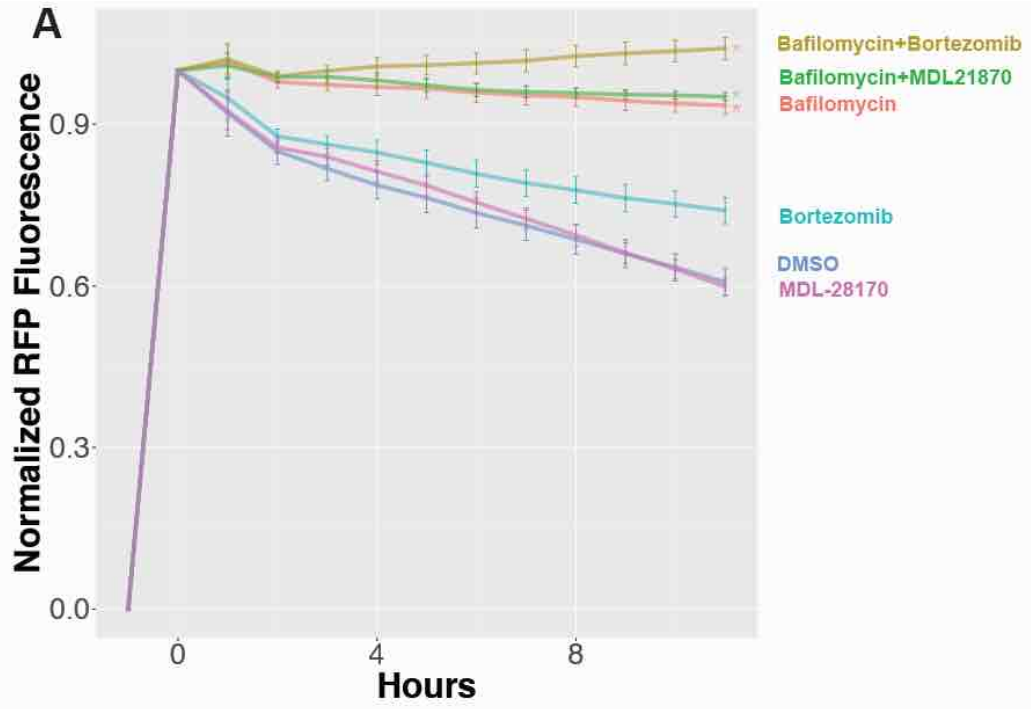

**B**

Curcumin

U74389G

BIM-1

Mitoxanthrone

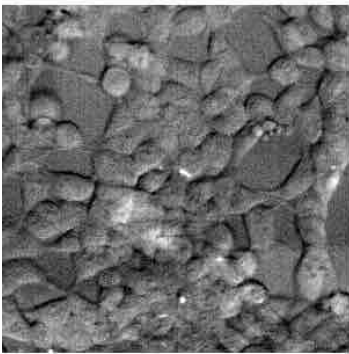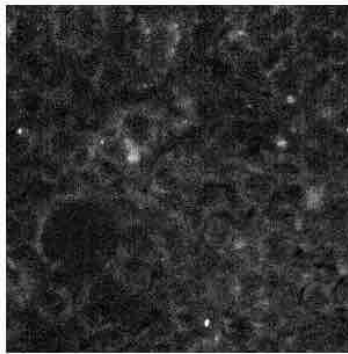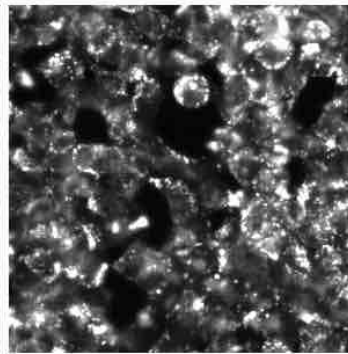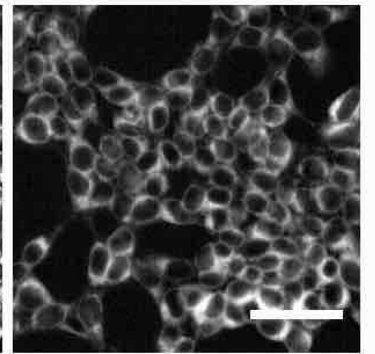



Fig. S4

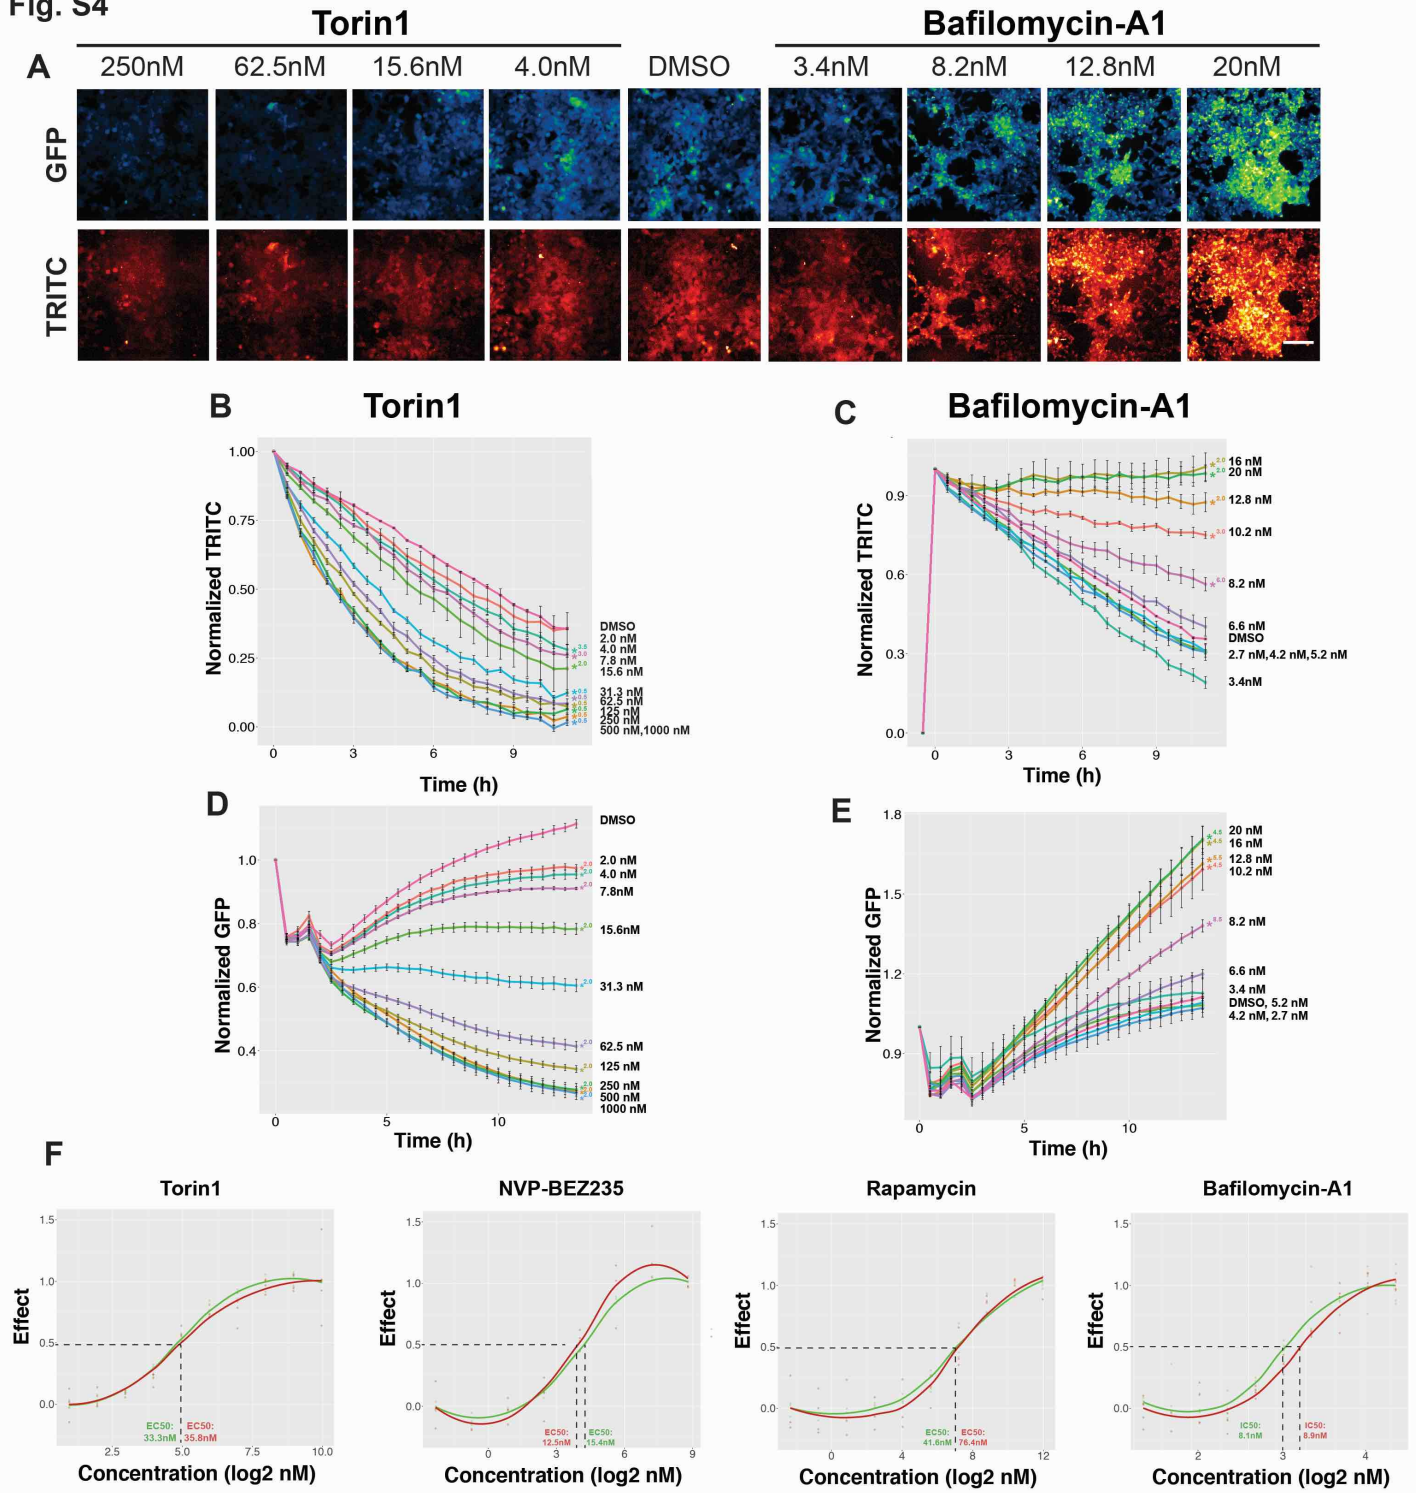



**Fig. S5**

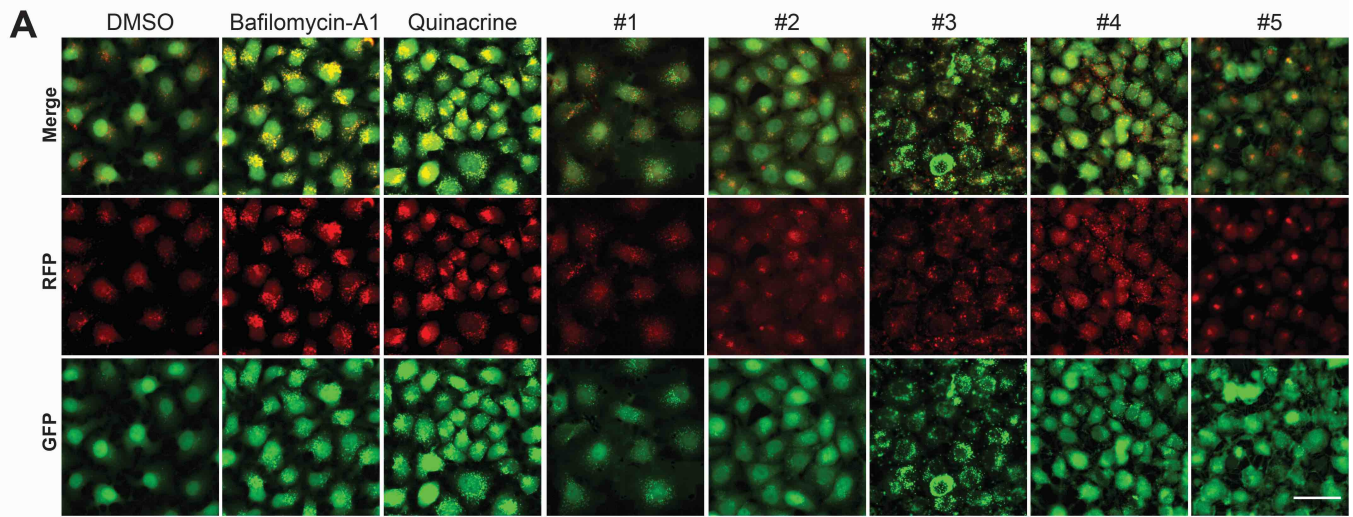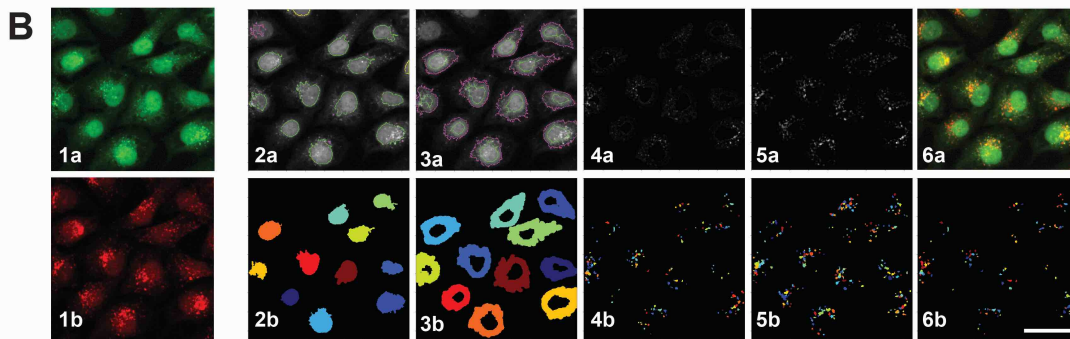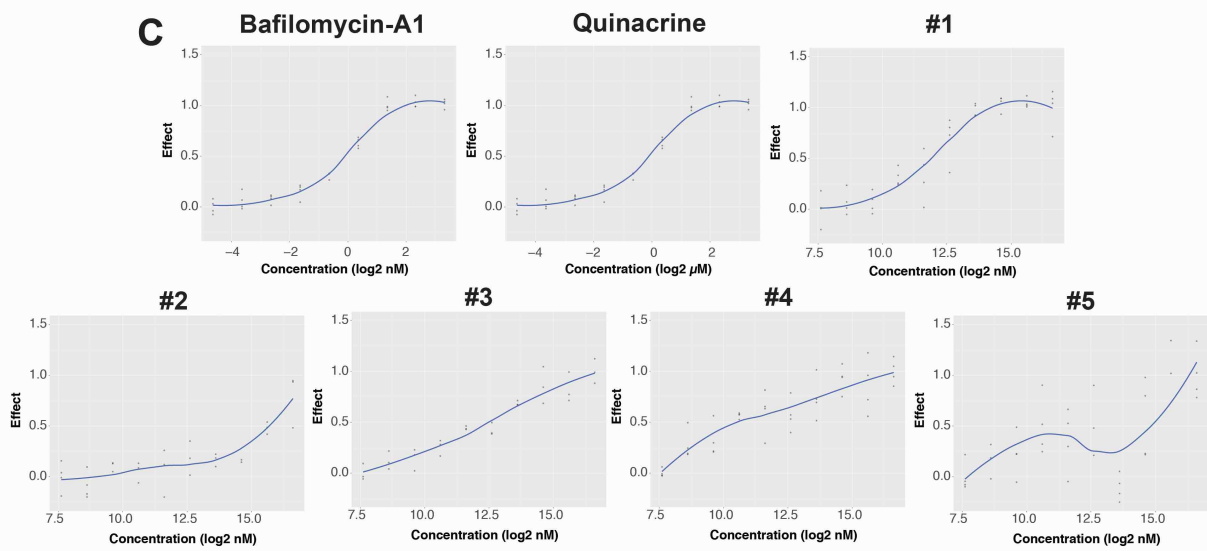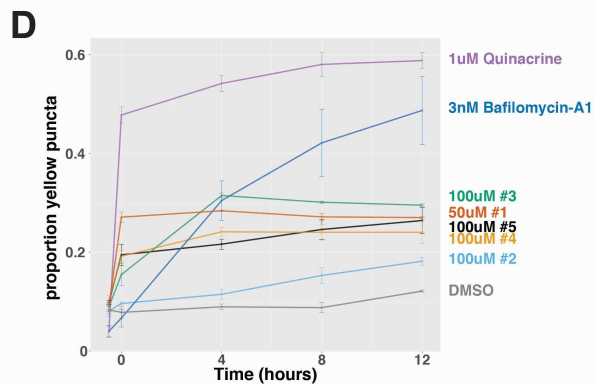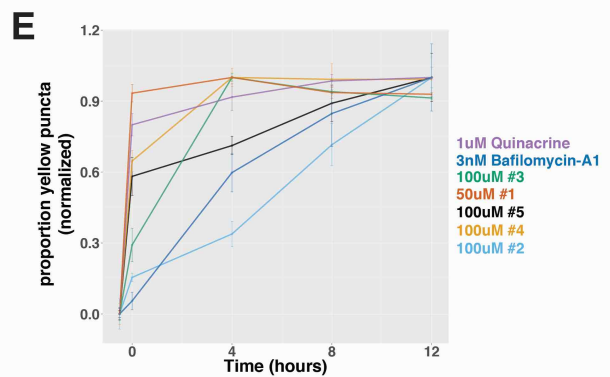

Fig. S6

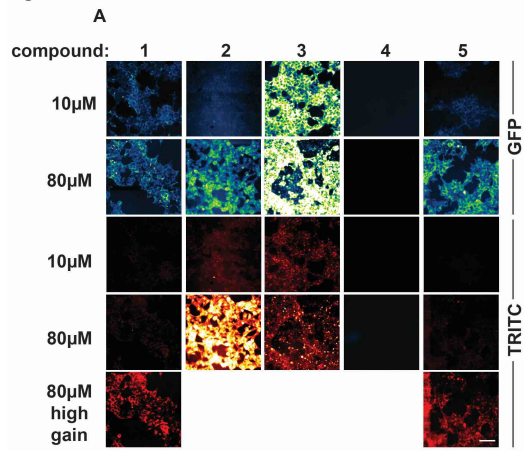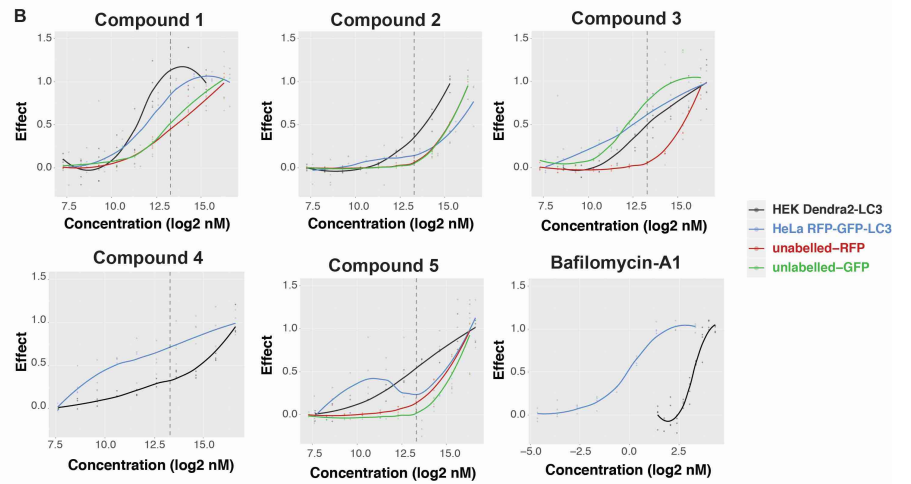

# Fig. S7

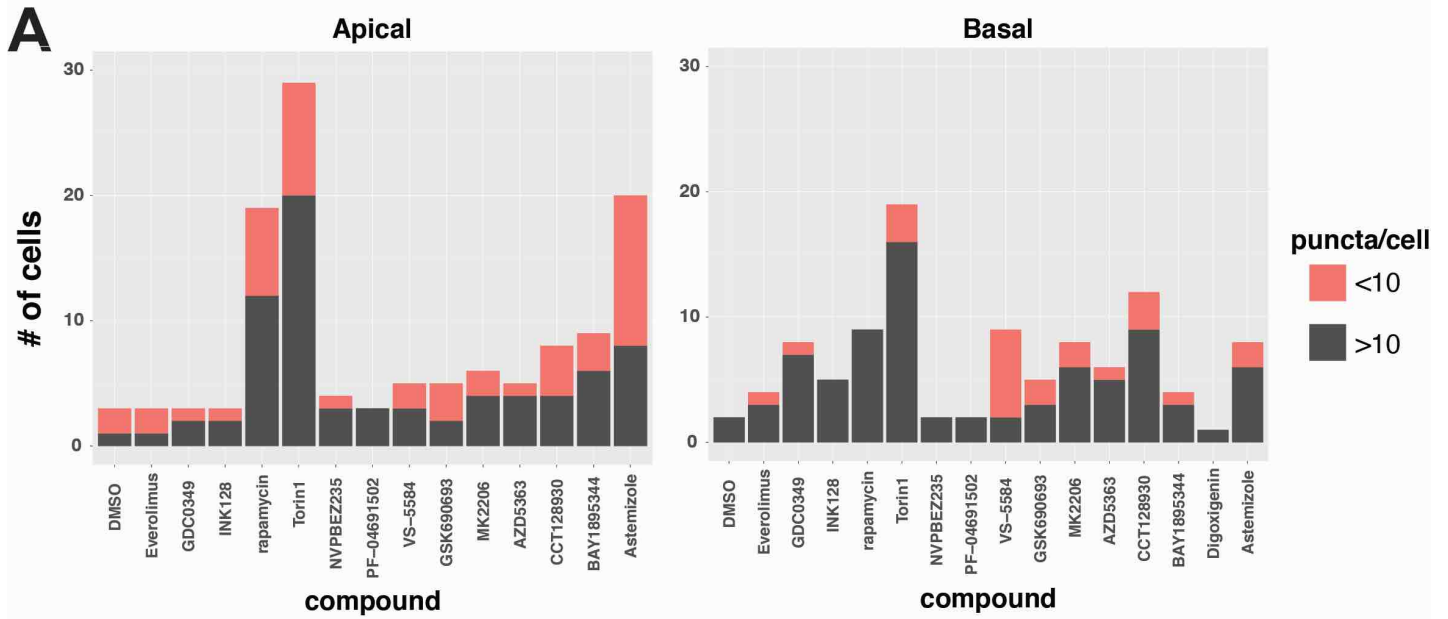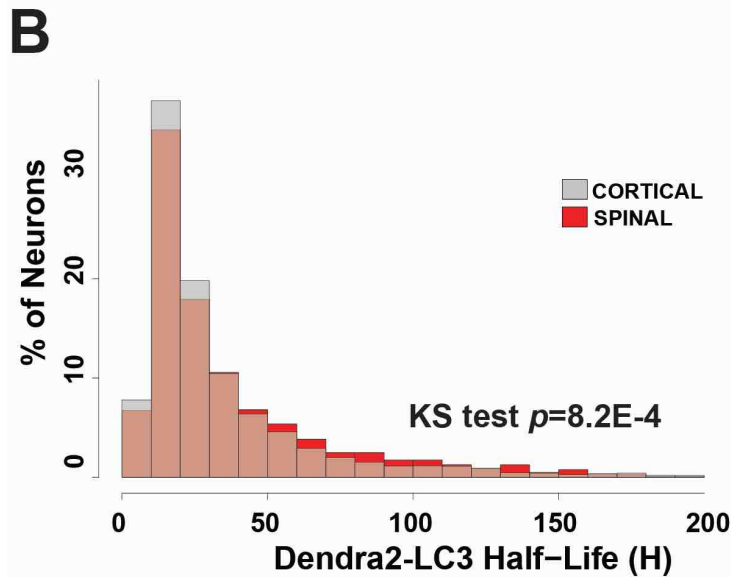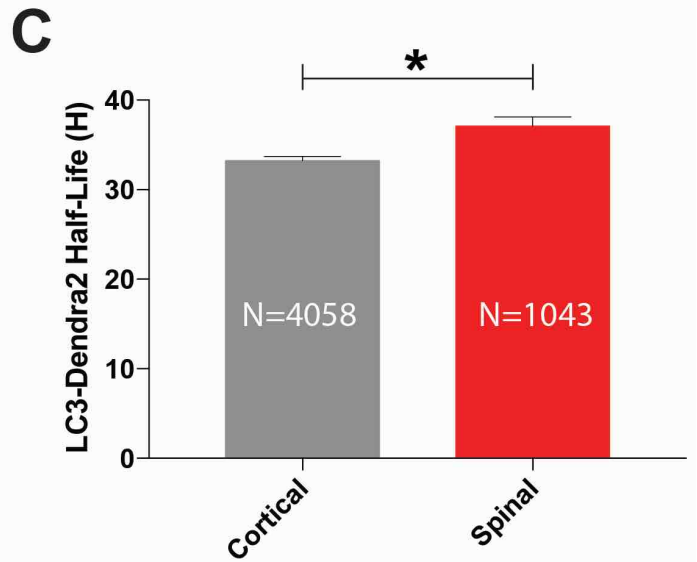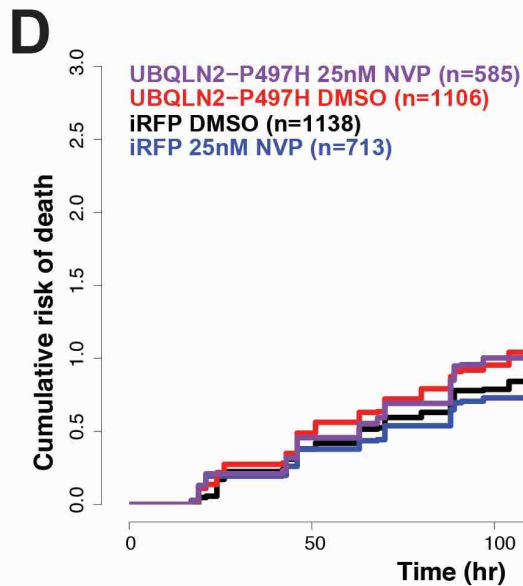

Supplement: mmc1.pdf [file mmc1.pdf]
